# Supplementary material for: Genome-Wide Identification of CYP72A Gene Family and Expression Patterns Related to Jasmonic Acid Treatment and Steroidal Saponin Accumulation in Dioscorea zingiberensis
Source: MDPI journal article supplement (doi:10.3390/ijms222010953), 2021-10-11
Supplement: s1 [file s1]

Table S6 The constrained result of RDA analysis

| Axis | Eigenvalue | Proportion Explained | Cumulative Proportion |
|------|------------|----------------------|-----------------------|
| RDA1 | 10157.5746 | 0.7976               | 0.7976                |
| RDA2 | 1490.9177  | 0.1171               | 0.9146                |
| RDA3 | 873.4672   | 0.0686               | 0.9832                |
| RDA4 | 168.9920   | 0.0133               | 0.9965                |
| RDA5 | 31.5857    | 0.0025               | 0.9990                |
| RDA6 | 9.5267     | 0.0007               | 0.9997                |
| RDA7 | 2.9864     | 0.0002               | 1.0000                |
| RDA8 | 0.4818     | 0.0000               | 1.0000                |
