# Supplementary material for: Genome-Wide Identification of CYP72A Gene Family and Expression Patterns Related to Jasmonic Acid Treatment and Steroidal Saponin Accumulation in Dioscorea zingiberensis
Source: MDPI journal article supplement (doi:10.3390/ijms222010953), 2021-10-11
Supplement: s1 [file s1]

Table S5 DCA analysis of specialized metabolites in the biosynthesis of steroidal saponins

| Statiscs        | DCA1   | DCA2   |
|-----------------|--------|--------|
| Eigenvalues     | 0.0256 | 0.0076 |
| Decorana values | 0.0267 | 0.0004 |
| Axis lengths    | 0.3588 | 0.1952 |
