# Supplementary material for: Genome-Wide Identification of CYP72A Gene Family and Expression Patterns Related to Jasmonic Acid Treatment and Steroidal Saponin Accumulation in Dioscorea zingiberensis
Source: MDPI journal article supplement (doi:10.3390/ijms222010953), 2021-10-11
Supplement: s1 [file s1]

**The coding sequence (CDS) of *DzCYP72A* gene family**

**>*DzCYP72A1***

ATGGAGTCAGTGATGGGAGTGGTATGGGCGGCGGCGGCGGTGGCGGTGGTGGCGTGGGCG  
TGGAGGACGTTGGATTGGGTTTGGTGGAAAGCCGAGGAGGCTGGATCGGGAACCTCCGGCGG  
CAGGGCCTGCGCGGCAACCAAGTACCGACTCTTGACGCGGATCTCAAGGAAAACGCCCCG  
CTCTCCGAGAAGGCTAAATCCCGGCCCTCTGCCTCTTCACTGCCATGACATCGCCCCCGCGT  
TCTCCCTGTCCTCCACAACGCCATCAAAGATCACGGTAAAATCTCAATAACTTGGTTTGGGC  
CTTACCCAAGAGTGACCTTAATGGAGCCAGAGCTAGTCAAAGAAGTGTTGTCAAACAAATT  
TGGACATTTTGTAAAATAAGAGCAACTCCCCTTGCCAATTTTTTGGTCCAAGGACTTGTGA  
CTTATGAAGGTGAAAAGTGGGCCAAACATAGAAGGATCATCAACCCTGCATTCCATCTTGA  
GAACTAAAGCTAATGCTTCCAGCATTCTCTACATCTTGTGGTGAAGTATTAGAAGATGGG  
AGAAGATGATCCCTGATGAAGGCTCCCAAGAACTAAAATGTCTTTCCAGAGCTCCAAGACC  
TCACAAAAGATGTCATCTCCAGGACTGCATTCGTAGCAGCTATGAAGAAGGAAGAAGAATA  
TTTGAAGTCTAGCAGAGCAAATTCAGCTTCTTATCCCAGCTTTCCAGACTATATACATCCCT  
GGTTATCGATTTCTGCCCACACCAATGAACAAAAGAAGAAGCCAAGTGTACAATGAGATGA  
AAAGAATTCTTAAAGGCATGATAGAGAAGAGAGAGAAGGCCATAAGAATGGGGGACAGTA  
GCAAGAATGACCTTCTGGGTTTGTACTAGACTCCAATATGAAGGAGGGTGAAGAGCATGG  
GAAGTCCCAAAATAAAGGGATGAGCACTGAGGATGTGATTGAAGAGTGCAAGCTGTTCTAC  
TTTGCAGGGCAAGAGACTACAGCAGTTCTACTCACATGGACAATGATTTTATTGAGCATGTA  
TCCAAACTGGCAGGCTAAGGCAAGAGAAGAGGTACTTCAAGTCTTTGGAAAGAACACACC  
AGACATGGAGGGATTGAGCCACTTGAAGATTGTGACCATGATTCTATATGAAGTTCTGAGGT  
TATATCCACCATTTGTTTTACTAAGAAGAAAAACCTACAAAGCAATGGAAGTCCGGTGGGATT  
ATTTACCTCCGGGAGTGATGCTCTCACTGCCTCTACTCTTCATTACCATGACCCTGCTTTT  
TGGGGAGAAGACGCCAAAGAGTTTAATCCAGAGAGGTTTTCCGAAGGGATATCAAAAGCA  
TCCAAAGTTCCAGGTGCCTTCTTTCCTTTTCGGTGGAGGTCCACGCATTTGCATTGGCCAAAG  
CTTTGCAATGATTGAAGCTAAGATAGGAATTTGCATGATTCTTCAGTGTCTCCTTTGAGCT  
TTCACCTTCTATATCCATGCACCGCACACTGTTATTACTCTTCAACCACAGCATGGGGCTCA  
ACTCATGCTGCAAAAGCTGTGA

**>*DzCYP72A2***

ATGGAGTCAGTGATGGGAGTGGTATGGGCGGCGGCGGCGGTGGCGGTGGCGGTGGTGGCG  
TGGGCGTGGAGGACGTTGGATTGGGTTTGGTGGACGCCGAGGAGGCTGGATCGGGAGCTC  
CGGCAGCAGGGCCTGCGCGGCAACCAAGTACCGAGTCTTGACGCGGATCTCAAGGAAAAC  
GCCCCGCTATCCGAGGAGGCTAAATCCCGGCCCTCTGCCTCTTCACTGCCATGACATCGCCCC  
CCGCGTTGTCCCTGTCCTCCACAACGCCATCAAAGATCACGGTAAAATCTCAATAACTTGGT  
TTGGGCCTTACCCAAGAGTGACCTTAATGGAGCCAGAGCTAGTGAAAGAAGTGTTGTCAA  
ACAAGTTTGGACATTTTGTAAAAGTAAGACCAAATCCCCTTACCAAATTATTGGTCCAAGGA  
CTTGTAGTTTATGAAGGTGAAAAGTGGGCCAAACACAGAAGGATCATCAACCCTGCATTCC  
ATCTTGAGAACTAAAGCTAATGCTTCCAGCATTCTCTACATCTTGTGGTGAAGTATTAGA  
AGATGGGAGAAGATGATCCCTGATGAAGGCTCCCATGAACTAAATGTCTTTCCAGAGCTCC  
AAGACCTCACAAAAGATGTCATCTCCAGGACTGCATTCCGGTAGCAGCTATGAAGAAGGAAG  
AAGAATATTTGAACTCCTAGCAGAGCAAATTCAGCTTCTTATCCCAGCTTTCCAGACTATATA  
CATCCCTGGTTATCGATTTCTGCCCACACCAATGAACAAAAGAAGAAGCCAAGTGTACAAT  
GAGATGAAAAGAATTCTTAAAGGCATGATAGAGAAGAGAGAGAAGGCCATAAGAATGGGG  
GACAGTAGCAAGAATGACCTTCTGGGTTTGTACTAGACTCCAATATGAAGGAGGGTGAAG

AGCATGGGAAGTCCCAAAACAAAGGGATGAGCACTGAGGATGTGATTGAAGAGTGCAAGC  
TGTTCTACTTTGCAGGGCAAGAGACTACAGCAGTTCTACTCACATGGACAATGATTTTATTG  
AGCATGTATCCAAACTGGCAGGCTAAGGCAAGAGAAGAGGTACTTCAAGTCTTTGGAAAG  
AGCACACCAGATATGGAGGGATTGAACCACTTGAAGATTGTGACCATGATTCTATATGAAGT  
TCTGAGGTTATATCCACCATTGTGTTTTCTAACAAGAAAAACCTACAAAGCAATGGAACCTG  
GTGGGATTACTTACCCTCAAGGAGTGATACTCTCACTGCCTCTACTCTTCATTACCATGACC  
CTGCTTTTTGGGGAGAAGACGCCAAAGAGTTTAATCCAGAGAGGTTTTCCGAAGGGATATC  
GAAAGCATCCAAAGTTCCGGGTGCCTTCTTTCTTTTCGGTGGAGGTCCGCGCATTGTCATTG  
GCCAAAGCTTTGCAATGATTGAAGCTAAGATAGGAATTTGCATGATTCTTCAGCGCTTCTCC  
TTTGAGCTTTTCGCTTCTCTATATCCATGCACCGCACACTGTTATTACTCTTCAACCACAGCAT  
GGGGCTCAACTCATGCTGCAAAAGCTGTGA

**>DzCYP72A3**

ATGGAGTTAGTGATGGGAGTGGTATGGGCGGCGGTGGCGGTGGTGGCGTGGGCGTGGAGG  
ACGTTGGATTGGGTTTGGTGGACGCCGAGGAGGCTGGATCGGGAGCTCCGGCGGCAGGGC  
CTGCGCGGCAACCAGTACCGACTCTTGACGCGCATCTCAAGGAAAACGCCCAGCTCTCC  
GATGAAGCTAAATCCCGGCTCTGCCTCTTCACTGCCATGACATCGCCCCCGCGTTCTCCC  
TCTCTTCCACAACGCCATCAAAGATCACGGTAAAATCTCAATAACTTGGCTTGGTCTTACC  
CAAGAGTGATCTTAGCAGAGCCAGAGCTAGTGAAAGAAGTACTCTCAAACAAGTTTGGAC  
ATTTTGTAAACCAAGTACAACCTCCCCTTGCCAAATTTTTGGTCCAAGGGCTTGCGTCTTAT  
GACGGTGAAAAGTGGGTCAAACACAGAAGGATCATCAACCCTGCATTCCATTTGAGAAA  
CTAAAGCAAATGCTGCCAGCATTCTCTACGTCTTGTGGTGAACCTATTAGAAGATGGAACAA  
GATGATCCCTGATGAAGGCTCCCAAGAACTAAATGTCTTTCCAGAGCTCCAAGGCCTCACA  
AAAGATATCATCTCCAGAACCGCATTCGGTAGCAGCTATGAAGAAGGGAGAAGAATATTTG  
AACTCCTAACTGAACAAATTAAGCTTACTATTCCAGCTTTCAAGACTGTATACATCCCTGGTT  
ATCGATTTCTGCCCACACCAATGAACAAAAGAAGAAGCCAAGTGTACAATGAGATGAAAA  
GAATCTTAAAGGCATGATTGAGAAGAGAGAGAAGGCCATAAGAATGGGGGAAAGTAGCA  
AGAATGACCTTCTGGGTTTGCTACTAGACTCCAATATGCAGGAGGGTGAAGAGCATGGGAA  
GTCCCAAGACAAAGGGATGAGCACTGAGGATGTGATTGAAGAGTGCAAGCTGTTTTACATT  
GCAGGGCAAGAGACTACATCAGCTCTACTCACTTGGACAATGATTTTATTGAGCATGTATCC  
GAACTGGCAGGCTAATGCAAGAGAAGAGGTTCTTCAAGTCTTTGGAAAGAGCACACCAGA  
CATAGAGGGATTGAGTCACTTGAAGATTGTGACCATGATTCTATATGAAGTTCTCAGGTTATA  
TCCACCAGGGGTTTTTTCTTGATAGAAAAACCTACAAAGCAATGGAACCTGGTGGGATTACT  
TACCTTCAGGAGTGATACTCTCACTACCTCTACTCTTCATTACAAATGACCCTACTTTCTGG  
GGAGAGGATGCCAAAGAGTTCAATCCAGAGAGGTTTTCCGAAGGGATATCAAAGCATCC  
AAAGTTCCAGGGGCCCTTCTTTCTTTTGGTGGAGGTCCGCGCATTGTCATTGGCCAAAACCT  
TGCACTGATGGAAGCTAAGATAGGAATTTGCATGATTATTCAGCACTTCTCATTGTGCTTTC  
ACCTTCCTATATCCATGCACCGCACTCTGTTATTACTCTTCAACCACAGCATGGAGCTCAACT  
CATGCTGCAAAAGCTGTGA

**>DzCYP72A4**

ATGGAGTTAGTGATGGGAGTGGTATGGGCGGCGGCGGTGGTGGTGGTGGCGTGGGCGT  
GGAGGACGTTGGATTGGGTTTGGCGGACGCCGATGAGGCTGGACCGGGAGCTCCGGCGCC  
AGGGCCTGCGCGGCAACCAGTACCGAGTCTTCCATGGCGATCTCAAGGAAAACGCCCCGC  
TCTCGAAGGAGGCTGAATCCCGGCTCTGCCTCTTCACTGCCATGACATCGCCCCCGCGTT  
CTCCCTCTCTTCCACAATGCCATCAAAGATCACGGTAAAATCTCAATAACTTGGCTTGGCCC

TTGTCCAAGAGTGACCTTAACGGAACCAGAACTAGTAAAAGAAGTGTTAAACAAGTTTGG  
ACATTTTGTAAACCAAGTACAACCTCCTTTTGCCAAATTTTGGTCCAAGGGCTTGTGTATTA  
TGAAGGAGAACACTGGGCCAAACATAGAAGGATACTCAACCCTGCATTCCATCTTGAGAAA  
CTAAAGCTAATGTTGCCAGCATTCTCTACATCTTGTAGTGAATTGATTAGAAGATGGGAGAA  
GATGATTCCTGATGAAGGCTCCCAAGAACTAAATGTCTTTCCAGAGCTCCAAGGCCTCACA  
AAAGATGTCATCTCTAGGACTGCATTAGTAGCAGCTATGAAGAAGGGAGAGAATATTTG  
AACTCCTAAAAGAGCAAATTCAGCTTTATATTCAAGTTTACAAGACTGTATACATCCCTGGTT  
ATCGATTTCTGCCCACACCAATGAACAAAAGAAGAAGCCAAGTATACAATGAGATGAAAAG  
AATTCTTAAAGGCATGATTGGAGAAGAGAGAAAAGGCCATAAGAATGGGGAAAGTTGTAA  
GGATGACCTTCTGGGTTTGTACTAGACTCCAATATGAAGGAGGGTGAAGAGCATGGCAAG  
TCCCAAAACAAAGGGATGAGCACTGAGGAAGTGATTGAAGAGTGCAAGCTGTTCTACTTT  
GCAGGGCAAGAGACTACCCCTCACTTTTACTCACATGGACAATGATTTTATTGAGCATGTA  
TCCGAACCTGGCAGACTAAGGCAAGAGAAGAGGTTCTTAAAGTCTTTGGAAAGAACACACC  
AGACATGGAGGGATTGAGCCACTTGAAGATTGTGACCATGATTCTATATGAAGTTCTTAGGT  
TATATCCACCAGTGGTTTTCTATAACAAGAAAAACCTACAAAGCAATGGAACCTCGGTGGGAT  
TACTTACCCTCCAGGAGTGATTTCTCATTGCCTTTACTCTTCATTACCATGACCCTACTTTT  
TGGGGAGAAGATGCCAAAGAGTTTAAATCCAGAGAGGTTTTCCGAAGGGATATCGAAAGCAT  
CCAAAGTTCCGGCTGCCTTCTTTCTTTTCGGTGGAGGTCCACGCATTTGCATTGGTCAAAAC  
TTTGCACTGATTGAAGCTAAGATAGGAATTTGCATGATTCTTCAGCACTTTTCCTTTGTACTT  
TCGCTGCTTTCTATATTATGCACCGCACACTGTTATTACTCTTCAACCAGAGCATGGAGCT  
CAACTCATGCTGCAAAAGTTGTGA

**>DzCYP72A5**

ATGGAGTCAGTGATGGGAGTGGTATGGGCGGCGGCGGCGGTGGCGGTGGTGGCGTGGGCG  
TGGAGGACGTTGGATTGGGTTTGGTGGACGCCGAGGAGGCTGGATCGGGAGCTCCGGCAG  
CAGGGCCTGCGCGGCAACCAGTACCGAGTCTTGACGCGCATCTCAAGGAAAACACCCGG  
CTATCCGAGGAGGCTAAATCCCGGCCTCTGCCTCTTCACTGCCATGACATCGCCCCCGCGT  
TGTCCCTGTCTCCACAACGCCATCAAAGATCACGGTAAAATCTCAATAACTTGGTTTGGGC  
CTTACCCAAGAGTGACCTTAATGGAGCCAGAGCTAGTGAAAGAAGTGTTGTCAAACAAGT  
TTGGACATTTTGCTAAAGTAAGACCAAATCCCCTTACCAAATTATTGGTCCAAGGACTTGTA  
GTTTATGAAGGTGAAAAGTGGGCCAAACACAGAAGGATCATCAACCCTGCATTCCATCTTG  
AGAAACTAAAGCTAATGCTTCCAGCATTCTCTACATCTTGTGGTGAAGTGAAGATGG  
GAGAAGATGATCCCTGATGAAGGCTCCCATGAACTAAATGTCTTTCCAGAGCTCCAAGACC  
TCACAAAGATGTCATCTCCAGGACTGCATTCCGTAGCAGCTATGAAGAAGGAAGGAAGAA  
GAATATTTGAAGTACTAGCAGAGCAAATTCAGCTTCTTATCCCAGCTTTCCAGACTTTATACA  
TCCCTGGTTATCGATTTCTGCCCACACCAATGAACAAAAGAAGAAGCCAAGTGTACAATGA  
GATGAAAAGAATTCTTAAAGGCATGATCGAGAAGAGAGAGAAGGCCATAAGAATGGGGGA  
AGGTAGCAAGAATGACCTTCTGGGTTTGTACTAGACTCCAATATCAAAGAGAGTGAAGAG  
CATGGGAAGTCCCAAAACAAAGTGATGAGCACTGAGGATGTGATTGAAGAGTGCAAGCTA  
TTCTACTTTGCAGGGCAAGAGACTACATCACTTTTACTCACATGGACAATGATTTTATTGAGT  
ATGTATCCGAACCTGGCAGGCTAAGGCAAGAGAAGAGGTTCTTCAAGTCTTTGGAAAGAAC  
ACACCAGACATGGAGGGATTGAGCCACTTGAAGATTGTGACCATGATTCTATATGAAGTTCT  
GAGGTTATATCCACCATTTGTTTTACTAAGAAGAAAAACCTACAAAGCAATGGAACCTCGGT  
GGGATTACTTACCCTCCGGGAGTGATACTCTCACTGCCTCTACTCTTCATTACCATGACCCT  
GCTTTTTGGGGAGAAGACGCCAAAGAGTTTAAATCCAGAGAGGTTTTCCGAAGGGATATCGA

AAGCATCCAAAGTTCCAGGTGCCTTCTTTCTTTTCGGTGGAGGTCCACGCATTTGCATTGGC  
CAAAGCTTTGCAATGATTGAAGCTAAGATAGGAATTTGCATGATTCTTCAGTGTTTCTCCTTT  
GAGCTTTCACCTTCCTATATCCATGCACCGCACACTGTTATTACTCTTCAACCACAGCATGGG  
GCTCAACTCATGCTGCAAAAGCTGTGA

**>DzCYP72A6**

ATGGAGTTAGTGATGGGAGTGGTATGGGCGGCGGTGGCGGTGGTGGCGTGGGCGTGGAGG  
ACGTTGGATTGGGTTTGGTGGACGCCGAGGAGGCTGGACCGGGAGCTCCGGCGGCAGGGC  
CTGCGCGGCAACCAGTACCGAGTATTGCACGGCGATCTCAAGGAAAACGCCAGCTCTCCG  
AGGAGGCTAAATCCCGGCCTCTGCCTCTTCACTACCATGACATCGCCCCCGCGTTCTCCCT  
CTCTTCCACAACGCCATCAAAGATCACGAGCCAGAGCTAGTGAAAGAAGTACTCTCAAAC  
AAGTTTGGACATTTTGTAAACCAAGTACAACCTCCCTTGCCAAATTTTTGGTCCAAGGGCT  
TGCGTCTTATGACGGTGAAAAGTGGGTCAAACACAGAAGGATCATCAACCCTGCATTCCAT  
TTTGAGAACTAAAGCAAATGCTGCCAGCATTCTCTACGTCTTGTGGTGAACCTATTAGAAG  
ATGGAACAAGATGATCCCTGATGAAGGCTCCCAAGAACTAAATGTCTTTCCAGAGCTCCAA  
GGCCTCACAAAAGATATCATCTCCAGAACCGCATTTCGGTAGCAGCTATGAAGAAGGGAGAA  
GAATATTTGAACCTCTAACTGAACAAATTAAGCTTACTATTCCAGCTTTCAAGACTGTATACA  
TCCCTGGTTATCGATTTCTGCCACACCAATGAACAAAAGAAGAAGCCAAGTGTACAATGA  
GATGAAAAGAATTCTTAAAGGCATGATTGAGAAGAGAGAGAAGGCCATAAGAATGGGGGA  
AAGTAGCAAGAATGACCTTCTGGGTTTGCTACTAGACTCCAATATGCAGGAGGGTGAAGAG  
CATGTGAAGTCCCAAGACAAAGGGATGAGCACTGAGGATGTGATTGAAGAGTGCAAGCTG  
TTTTACATTGCAGGGCAAGAGACTACATCAGCTCTACTCACTTGGACAATGATTTTATTGAG  
CATGTATCCGAACCTGGCAGGCTAATGCAAGAGAAGAGGTTCTTCAAGTCTTTGGAAAGAGC  
ACACCAGACATAGAGGGATTGAGTCACTTGAAGATTGTGACCATGATTCTATATGAAGTTCT  
CAGGTTATATCCACCAGGGGTTTTTCTTGATAGCAAAACCTCCAAAGCAATGGAACCTTGGTG  
GGATTACTTACCCTTCAGGAGTGATACTCTCACTACCTCTACTCTTCATTCACAATGACCCTA  
CTTTCTGGGGAGAGGATGCCAAAGAGTTCAATCCAGAGAGGTTTTCCGAAGGGATATCGAA  
AGCATCCAAAGTTACAGGGGCCTTCTTTCTTTTGGTGGAGGTCCGCGCATTTGCATTGGCC  
AAAACCTTTGCACTGATGGAAGCTAAGATAGGAATTTGCATGATTATTCAGCACTTCTCATTT  
GTGCTTTCACCTTCCTATATCCATGCACCGCACTCTGTTATTACTCTTCAACCACAGCATGGA  
GCTCAACTCATGCTGCAAAAGCTGTGA

**>DzCYP72A7**

ATGAGGCTGGACCGGGAGCTCCGGCGCCAGGGCCTGCGCGGCAACCAGTACCGAGTCTTC  
CATGGCGATCTCAAGGAAAACGCCCGGCTCTCGAAGGAGGCTGAATCCCGGCCTCTGCCTC  
TTCATGCCATGACATCGCCCCCGCGTTCTCCCTCTCTTCCACAACGCCATCAAAGATCAC  
GGTAAAATCTCAATAACTTGGCTTGGCCCTTGTCCAAGAGTGACCTTAACGGAACCAGAAC  
TAGTAAAAGAAGTGTTAAACAAGTTTGGACATTTTGTAAACCAAGTACAACCTCCTTTTGGC  
AAATTTTTGGTCCAAGGGCTTGTGTCTTATGAAGGTGAAAAGTGGGCCAAACATAGAAGGA  
TCCTCAACCCTGCATTCCATCTAGAGAACTAAATCTAATGTTGCCAGCATTCTCTACATCTT  
GTAGTGAATTGATTAGAAGATGGGAGAAGATGATTCCTGATGAAGGCTCCCAAGAACTAAA  
TGTCTTTCCAGAGCTCCAAGGCCTCACAAAAGATGTCATCTCTAGGACTGCATTCAGTAGC  
AGCTATGAAGAAGGGAGAAGAATATTTGAACTCCTAAAAGAGCAAATTCAGCTTTATATTCA  
AGTTTACAAGACTGTATACATCCCTGGTTATCGATTTCTGCCACACCAATGAACAAAAGAA  
GAAGCCAAGTATACAATGAGATGAAAAGAATTCTTAAAGGCATGATTGAGAAGAGAGAAA  
AGGCCATAAGAATGGGGGAAAGTTGTAAGGATGACCTTCTGGGTTTGTTACTAGACTCCAA

TATGAAGGAGGGTGAAGAGCATGGCAAGTCCCCAAAACAAAGGGATGAGCACTGAGGAAG  
TGATTGAAGAGTGCAAGCTGTTCTACTTTGCAGGGCAAGAGACTACCTCACTTTTACTCAC  
ATGGACAATGATTTTATTGAGCATGTATCCGAAGTGGCAGACTAAGGCAAGAGAAGAGGTT  
CTTAAAGTCTTTGGAAAGAACACACCAGACATGGAGGGATTGAGCCACTTGAAGATTGTGA  
CCATGATTCTATATGAAGTTCTTAGGTTATATCCACCAGTGGTTTTTCATAACAAGAAAAACCT  
ACAAAGCAATGGAACTCGGTGGGATTACTTACCCTCCAGGAGTGATATTCTCATTGCCTTTA  
CTCTTCATTACCATGACCCTACTTTTTTGGGGAGAAGATGCCAAAGAGTTTAATCCAGAGAG  
GTTTTCCGAAGGGATATCGAAAGCATCCAAAGTTCCGGGCTGCCTTCTTTCTTTTCGGTGGAG  
GTCCACGCATTTGCATTGGTCAAACTTTGCACTGATTGAAGCTAAGATAGGAATTTGCATG  
ATTCTTCAGCACTTTTCCTTTGTACTTTTCGCTTTCCTATATTCATGCACCGCACACTGTTATTA  
CTCTTCAACCAGAGCATGGAGCTCAACTCATGCTGCAAAAGTTGTGA

**>DzCYP72A8**

ATGGAGTCAGTGATGGGAGTGGTATGGGCGGCGGCGGCGGTGGCGGTGGTGGCGTGGGCG  
TGGAGGACGTTGGATTGGGTTTGGTGGAAAGCCGAGGAGGCTGGATCGGGAACCTCCGGCGG  
CAGGGCCTGCGCGGCAACCAGTACCGACTCTTGACGCGCATCTCAAGGAAAACGCCCGG  
CTCTCCGAGGAGGCTAAATCCCGGCCTCTGCCTCTTCACTGCCATGACATCGCCCCCGCGT  
TCTCCCTGTCCTCCACAACGCCATCAAAGATCACGGTAAAATCTCAATAACTTGGTTTGGGC  
CTTACCCAAGAGTGACCTTAATGGAGCCAGAGCTAGTCAAAGAAGTGTTGTCAAACAAATT  
TGGACATTTTGTAAAATAAGAGCAACTCCCCTTGCCAATTTTTTGGTCCAAGGACTTGTGA  
CTTATGAAGGTGAAAAGTGGGCCAAACATAGAAGGATCATCAACCCTGCATTCCATCTTGA  
GAACTAAAGCTAATGCTTCCAGCATTCTCTACATCTTGTGGTGAAGTATTAGAAGATGGG  
AGAAGATGATCCCTGATGAAGGCTCCCAAGAACTAAATGTCTTTCAGAGCTCCAAGACCT  
CACAAAAGATGTCATCTCCAGGACTGCATTCCGTAGCAGCTATGAAGAAGGAAGAAGAATA  
TTTGAACTCCTAGCAGAGCAAATTCAGCTTCTTATCCCAGCTTTCAGACTATATACATCCCT  
GGTTATCGATTTCTGCCCACACCAATGAACAAAAGAAGAAGCCAAGTGTACAATGAGATGA  
AAAGAATCTTAAAGGCATGATCGAGAAGAGAGAGAAGGCCATAAGAATGGGGGAAGGTA  
GCAAGAATGACCTTCTGGGTTTGTACTAGACTCCAATATCAAAGAGAGTGAAGAGCATGG  
GAAGTCCCCAAAACAAAGTGATGAGCACTGAGGATGTGATTGAAGAGTGCAAGCTATTCTAC  
TTTGCAGGGCAAGAGACTACATCACTTTTACTCACATGGACAATGATTTTATTGAGCATGTAT  
CCAAACTGGCAGGGTAAGGCAAGAGAAGAGGTACTTCAAGTCTTTGGAAAGAGCACACCA  
GATATGGAGGGATTGAACCACTTGAAGATTGTGACCATGATTCTATATGAAGTTCTGAGGTT  
ATATCCACCATTGTGTTTTCTAACAAGAAAAACCTACAAAGCAATGGAACTCGGTGGGATTA  
CTTACCCTCAAGGAGTGATACTCTCACTGCCTCTACTCTTCATTACCATGACCCTGCTTTTT  
GGGGAGAAGACGCCAAAGAGTTTAATCCAGAGAGGTTTTCCGAAGGGATATCAAAGCAT  
CCAAAGTTCCGGGTGCCTTCTTTCTTTTCGGTGGAGGTCCGCGCATTTGCATTGGCCAAAG  
CTTTGCAATGATTGAAGCTAAGATAGGAATTTGCATGATGCTTCAGCGCTTCTCCTTTGAGC  
TTTCGCCTTCTATATCCATGCACCGCACACTGTTATTACTCTTCAACCACAGCATGGGGCTC  
AACTCATGCTGCAAAAGCTGTGA

**>DzCYP72A9**

ATGGAGTCAGTGATGGGAGTGGTATGGGCGGCGGCGGCGGTGGCGGTGGTGGCG  
TGGCGTGGAGGACGTTGGATTGGGTTTGGTGGACGCCGAGGAGGCTGGATCGGGAGCTC  
CGGCAGCAGGGCCTGCGCGGCAACCAGTACCGAGTCTTGACGCGCATCTCAAGGAAAAC  
GCCCGGCTATCCGAGGAGGCTAAATCCCGGCCTCTGCCTCTTCACTGCCATGACATCGCCCC  
CCGCGTTGTCCCTGTCCTCCACAACGCCATCAAAGATCACGGTAAAATCTCAATAACTTGGT

TTGGGCCTTACCCAAGAGTGACCTTAATGGAGCCAGAGCTAGTGAAAGAAGTGTTGTCAA  
ACAAGTTTGGACATTTTGTCTAAAGTAAGACCAAATCCCCTTACCAAATTATTGGTCCAAGGA  
CTTGTAGTTTATGAAGGTGAAAAGTGGGCCAAACACAGAAGGATCATCAACCCTGCATTCC  
ATCTTGAGAACTAAAGCTAATGCTTCCAGCATTCTCTACATCTTGTGGTGAAGTGATTAGA  
AGATGGGAGAAGATGATCCCTGATGAAGGCTCCCATGAACTAAATGTCTTTCCAGAGCTCC  
AAGACCTCACAAAAGATGTCATCTCCAGGACTGCATTTCGGTAGCAGCTATGAAGAAGGAAG  
AAGAATATTTGAACTCCTAGCAGAGCAAATTCAGCTTCTTATCCCAGCTTTCCAGACTATATA  
CATCCCTGGTTATCGATTCTGCCCACACCAATGAACAAAAGAAGAAGCCAAGTGACAAAT  
GAGATGAAAAGAATTCTTAAAGGCATGATAGAGAAGAGAGAGAAGGCCATAAGAATGGGG  
GACAGTAGCAAGAATGACCTTCTGGGTTTGTACTAGACTCCAATATGAAGGAGGGTGAAG  
AGCATGGGAAGTCCCAAACAAAGGGATGAGCACTGAGGATGTGATTGAAGAGTGCAAGC  
TGTTCTACTTTGCAGGGCAAGAGACTACAGCAGTTCTACTCACATGGACAATGATTTTATTG  
AGCATGTATCCAACTGGCAGGGTAAGGCAAGAGAAGAGGTACTTCAAGTCTTTGGAAG  
AGCACACCAGATATGGAGGGATTGAACCACTTGAAGATTGTGACCATGATTCTATATGAAGT  
TCTGAGGTTATATCCACCATTGTGTTTCTTAACAAGAAAAACCTACAAAGCAATGGAACCTG  
GTGGGATTACTTACCCTCAAGGAGTGATACTCTCACTGCCTCTACTCTTCATTACCATGACC  
CTGCTTTTTGGGGAGAAGACGCCAAAGAGTTTAATCCAGAGAGGTTTTCCGAAGGGATATC  
GAAAGCATCCAAAGTTCCGGGTGCCTTCTTTCTTTTCGGTGGAGGTCCGCGCATTTGCATTG  
GCCAAAGCTTTGCAATGATTGAAGCTAAGATAGGAATTTGCATGATTCTTCAGCGCTTCTCC  
TTTGAGCTTAA

**>DzCYP72A10**

ATGGAGTTAGTGATGAGAGTGGTATGGGCGGTGGCGGCGGTGGCGGTGGTGGCGTGGGCG  
TGGAGGACGTTGGATTGGGTTTGGTGGACGCCGAGGAGGCTGGATCGGGAGCTCCGGCGG  
CAGGGCCTGCGCGGCAACCAGTACCGACTCTTGACGCGCATCTCAAGGAAAACGCCCAG  
CTCTCCGAGGAGGCTAAATCCCGGCCTCTGCCTCTTCACTACCATGACATCGCCCCCGCGT  
TCTCCCTCTCTTCCACAACGCCATCAAAGATCACGGTAAAATCTCAATAACTTGGCTTGGTC  
CTTACCCAAGAGTGATCTTAACAGAGCCAGAGCTAGTGAAAGAAGTACTCTCAAACAAGTT  
TGGACATTTTGTAAACCAAGTACAACCTCCCCTTGCCAAATTTTTGGTCCAAGGGCTTGCCT  
CTTATGACGGTGAAAAGTGGGTCAAACACAGGAGGATCATCAACCCTGCATTCCATTTTGA  
GAACTAAAGCAAATGCTGCCAGCATTCTCTACGTCTTGTGGTGAAGTTATTAGAAGATGGA  
ACAAGATGATCCCTGATGAAGGCTCCCAAGAACTAAATGTCTTTCCAGAGCTCCAAGGCCT  
CACAAAAGATATCATCTCCAGAACCGCATTCGGTAGCAGCTATGAAGAAGGGAGAAGAATA  
TTTGAACCTCTAACTGAACAAATTAAGCTTACTATTCCAGCTTTCAAGACTGTATACATCCCT  
GGTTATCAATTTCTGCCCACACCAATGAACAAAAGAAGAAGCCAAGTGACAAATGAGATGA  
AAAGAATTCTTAAAGGCATGATTGAGAAGAGAGAGAAGGCCATAAGAATGGGGGAAAGTA  
GCAAGAATGACCTTCTGGGTTTGTACTAGACTCCAATATGCAGGAGGGTGAAGAGCATGG  
GAAGTCCCAAGACAAAGGGATGAGCACTGAGGATGTGATTGAAGAGTGCAAGCTGTTTTA  
CATTGCAGGGCAAGAGACTACATCAGCTCTACTCACTTGGACAATGATTTTATTGAGCATGT  
ATCCGAACTGGCAGGCTAATGCAAGAGAAGAGGTTCTTCAAGTCTTTGGAAGAGCACAC  
CAGACATAGAGGGATTGAGCCACTTGAAGATTGTGACCATGATTCTATATGAAGTTCTCAGG  
TTATATCCACCAGGGGTTTTTCTTGATAGAAAACCTACAAAGCAATGGAACCTGGTGGGAT  
TACTTACCCTTCAGGAGTGATACTCTCACTACCTCTACTCTTCATTACAATGACCCTACTTT  
CTGGGGAGAGGATGCCAAAGAGTTCAATCCAGAGAGGTTTTCCGAAGGGATATCGAAAGC  
ATCCAAAGTTCCAGGGTCCTTCTTACCTTATGGTGTAGGTCCGCGCATTTGCATTGGCCAAA

ACTTTGCACTGATGGAAGCTAAGATAGGAATTTGCATGATTATTCAGCACTTCTCATTTGTGC  
TTTCACCTTCCTATATCCATGCACCGCACTCTGTTATTACTCTTCAACCACAGCATGGAGCTC  
AACTCATGCTGCAAAAGCTGTGA

**>DzCYP72A11**

ATGGAGTTAGTGATGGGAGTGGTATGGGCGGCGGCGGTGGTGATGCTGGTGGCGTGGGCGT  
GGAGGACGTTGGATTGGGTTTGGCGGACGCCGATGAGGCTGGACCGGGAGCTCCGGCGCC  
AGGGCCTGCGCGGCAACCAGTACCGAGTCTTCCATGGCGATCTCAAGGAAAACGCCCCGC  
TCTCGAAGGAGGCTGAATCCCGGCCTCTGCCTCTTCACTGCCATGACATCGCCCCCGCGTT  
CTCCCTCTCTTCCACAACGCCATCAAAGATCATGGTAAAATCTCAATAACTTGGCTTGGCCC  
TTATCCAAGAGTGACCTTAACGGAACCAGAACTAGTTATAGAAGTGTTAAACAAGTTTGGA  
CATTTTGTAAACCAAGTACAACCTCTTTTGCCAAATTTTGGTCCAAGGGCTTGTGTCTTAT  
GAAGGTGAAAAGTGGGCCAAACATAGAAGGATCCTCAACCCTGCATTCCATCTTGAGAAA  
CTAAAGCTAATGTTGCCAGCATTCTCTACATCTTGTAGTGAATTGATTAGAAGATGGGAGGA  
GAAGATTCTGATGAAGGCTCCCAAGAACTAAATGTCTTTCCAGAGCTCCAAGGCCTCACA  
AAAGATGTCATCTCTAGGACTGCATTCACTAGCAGCTATGAAGAAGGGAGAAGAATATTG  
AACTCCTAAAAGAGCAAATTCAGCTTTATATTCAAGTTTACAAGACTGTATACATCCCTGGTT  
ATCGATTTCTGCCCACACCAATGAACAAAAGAAGAAGCCAAGTATATAATGAGATGAAAAG  
AATTCTTAAAGGCATGATTGAGAAGAGAGAAAAGGCTATAAGAATGGGGGAAAGTTGTAA  
GGATGACCTTCTGGGTTTGTACTAGACTCCAATATGAAGGAGGGTGAAGAGCATGGCAAG  
ACCCAAAACAAAGGGATGAGCACTGAGGAAGTGATTGAAGAGTGCAAGCTGTTCTACTTT  
GCAGGGCAAGAGACTACCTCACTTTTACTCACATGGACAATGATTTTATTGAGCATGTATCC  
GAACTGGCAGGCTAAGGCAAGAGAAGAGGTTCTTCAAGTCTTGGAAAGAACACACCAGA  
CATGGAGGGATTGAGCCACTTGAAGATTGTGACCATGATTCTATATGAAGTTCTTAGGTTATA  
TCCACCACTGGTTTTCTTAACAAGAAAAACCTACAAAGCAATGGAACCTCGGTGGGATTACT  
TACCCTCCAGGAGTGATATTCTCATTGCCTTTACTCTTCATTACCATGACCCTACTTTTTTG  
GGAGAAGATGCCAAAGAGTTAATCCAGAGAGGTTTTCTGAAGGGATATCGAAAGCATCCA  
AAGTTTCGGCTGCCTTCTTTCCTTTCGGTGGAGGTCCACGCATTTGCATTGGTCAAACTTT  
GCACTGATTCAAGCTAAGATAGGAATCTGCATGATTCTTCAGCACTTTTCCTTTGTGCTTTG  
CTTTCCTATATTCATGCACCGCACACTGTTATTACTCTTCAACCACAGCATGGAGCTCAACTC  
ATGCTGCAAAAGTTGTGA

**>DzCYP72A12**

ATGGAGTCACTGATGGGAGTGATATGGGCGGTGGCGGCGGTGGTGCTGGTGGCGGCCGCG  
TGGAGGACGTTGGATTGGATTTGGTGGACGCCGAGGAGGCTGGACCGGGAGCTCCGACGC  
CAGGGCCTGCGCGGCAACCAGTACCGAGTCTTGCACGGCGATCTCAAGGAAAACGTCCGG  
CTCTCGAAGGAGGCTAAATCCCGGCCTCTGCCTCTTCACTGCCATGACATCGCCCCCGCGT  
TCTCCCTCTCTTCCACAACGCCATCAAAGATCACGGTAAAATCTCAATAACTTGGCTTGGCC  
CTTATCCAAGAGTGACCTTAACAGAGCCAGAGCTAGTGAAAGAAGTGCTGTCAAACAAGT  
TTGGACATTTTGTAAACCAACTACAACCTTAGCCAAATTTTGGTCCAAGGGCTTGTG  
TCTTATGAAGGTGAAAAGTGGGCCAAACACAGAAGGATCATCAATCCTGCATTCCATCTTG  
AGAAACTAAAGCTAATGCTGCCAGCATTCTCTACATCTTCTGGTGAAGTGAAGATGG  
GAGAAGATGATTCTAATGAAGGCTCCCAAGAACTAAATGTCTTTCCAGAGCTCCAAGACC  
TCACAAAAGATGTCATCTCCAGGACTGCATTCCGTAGCAGTTACGAAGACGGAAGAAGAAT  
ATTTGAACTCCTAACAGAGCAAATTCAGCTTCTTATTCCAGCTTTCCAGACTGTATACATTCC  
TGTTTTTCGATTTCTGCCCACACCAATGAACAAAAGAAGCAGCCAAGTGTACAATGAGATG

AAAAGAATTCTTATAGGCATGATTGAGAAGAGAGAGAAGGCCATAAGAATGGGGGAAAAGT  
AACAAGAATGACCTTCTGGGTTTGTACTAGACTCCAATATGAAGGAGGGTGAAGAGCATA  
GGAAGTCCCAAAACAAAGGGATGAGTACTGAGGATGTGATTGAAGAGTGCAAGCTGTTCT  
ACTTTGCAGGGCAAGAGACTACATCAGTTCTACTCACATGGACAATGATTTTATTGAGCATG  
TATCCAAATTGGCAGGCTAAGGCAAGAGAAGAGGTTCTTCAAGTCTTTGGAAAGAGCGCA  
CCAGATATGGAGGGATTGAGCCACTTGAAGATTGTGACCATGATTCTATATGAAGTTCTAAG  
GTTATATCCACCAGCGGTTTTCTAACAAGAAAAACCTACAAAGCAATGGAACCTCGGTGGG  
ATTACTTACCCTCCAGGAGTGATACTCTCACTGCCTCTACTCTTCATTACCATGACCCTGTT  
TTCTGGGGAGAAGACGCCAAAGAGTTTAATCCAGAGAGGTTTTCCGAAGGGATATCGAAA  
GCATCCAAAGTTCCAGGTGCCTTCTTTCCTTTCGGTGGAGGTCCGCGCATTTGCATTGGCCA  
AAACTTTGCACTGATTGAAGCTAAGATAGGAATTTGCATGATTCTTCAGCACTTCTCCTTTG  
TGCTTTCGCCTTCTATATCCATGCACCGCACAAATGTTATTACTCTTCAACCACAGCATGGAG  
CTCAACTCATGCTGCAAAAGCTGTGA

**>DzCYP72A13**

ATGGAGTTAGTGATGGGAGTGATATGGACGGTGACGGCGGCGGTGGTGGTGGTGTGGGCGT  
GGAGGACGTTGGATTGGGTTTGGTGGACGCCGAGGAGGCTGGACCGGGATCTCCGGCGCC  
AGGGCCTGCGCGGCAACCAGTACCGATTATTGCACGGCGATCTCAAGGAAAACGCCCGGCT  
CTCCAAGGAGGCTACATCCCGGCCTTTGCCTCTTCACTGCCATGACATCGCTCCCAGGGTTG  
CCCCTCTCATCCACAACGCCATCAAAGATCACGGTAAAATATCAATAACTTGGCTTGGACCT  
TATCCAAGAGTGTCTTGATGGACCCAGATTTAGTGAAAGAAGTACTGTCAAACAAGTTTG  
GACATTTTGTAAACCAAGAATAACTCCTATTGCCAAATTTTTGGTCCAAGGACTTGTAGCT  
TATGAAGGTGAAAAGTGGGCCAAACACAGAAGGATAATTAACCCCGCATTCCATCTTGAGA  
AACTAAAGCTAATGCTGCCAGCATTCTCTACATCTTCTGGTGAAGTGAAGATGGGAG  
AAGATGATCCCTGATGAAGGCTCCCAAGAACTAAATGTCTCGCCAGAGATCCAAAACCTCA  
CAGGAGATGTCATCTCCAGGACTGCATTCCGGTAGCAGCTATGAAGAAGGGAGAAGAATATT  
TGAATCCTAACAGAGCAAATTCATCTTACTATTCCAGCTTTGCAGACTGTATACATCCCTGG  
TTATCGGTTTCTGCCCACACCAATGAACAACAGAAGAAGCCAAGTTTACAATGAGATGAAA  
AGAATTCTTAAAGGCATGATTGAGAAGAGAGAGAAGGCCATAAGAATGGGGGAAAAGTAGC  
AAGAATGACCTTCTGGGTTTGTACTAGACTCCAATATGAAGGAGGGTGAAGAGCAGGAGA  
AGTCCCAAAACAAAGTGATGAGCACTGAGGATGTGATTGAAGAGTGCAAGCTGTTCTACTT  
TGCAGGGCAAGAGACTACATCAGTTCTACTCACATGGACAATGATTTTATTGAGCATGTATC  
CTAACTGGCAGGCCAAGGCAAGAGAAGAGGTTCTTCAAGTCTTTGGAAAGAGCACACCAG  
ACATGGATGGATTGAGCCGCTTGAAGATTGTGACCATGATTCTGTATGAAGTTCTGAGGTTA  
TATCCACCGGTGACTTTCCTAACCAGAAAAACATACAAAGCAATGGAACCTGGTGGGATCA  
ATTACCCTCCAGGAGTGTTACTCCAACCTGCCTCTACTCTTCATTACCATGACCCTGAATTCT  
GGGGAGAAGACGCCAAAGAGTTCAATCCCGAGAGGTTTTCTGAAGGGATATTGAAAGCAT  
CCAAAGTTCCGGGTGCCTTCTTTCCTTTCGGTGGAGGTCCGCGCATTTGCATTGGCCAAAG  
CTTTGCACTGATTGAAGCTAAGATTGGAATTAGCATGATTCTTCAGCACTTCTCCTTCGTGCT  
CTCGCCTTCGTATATCCATGCACCGCACACTGCTCTTACTCTTCAACCACAGCATGGAGCTC  
AACTCATGCTTCAAAAACCTCTGA

**>DzCYP72A14**

ATGGAGTACTCAGTGGCGGCAGGGGTGAAGGAGATGATATGGGGTGTGGCAACGGCGCTG  
TTGGTGGTGTGGGTGTGGAGGACGTTGGAGTGGTTGTGGTGGGAAGCCGAGGAGGCTGGAG  
CGCGAGCTGAAGAGGCAGGGATTGCGCGGAGGCAAGTACCGTCTCTTCCACGGCGATCTC

AAGTACAACGCGCGACTCATGAAGGATGCTCTTTCTCGCCCCCTTGCCCCCTTACTCTCACGA  
CGTCGCCCCACGAGTCATCCCTCTCGTCCATCAAGCTATCAAGATTCATGGTAAAATGTCTAT  
AACATGGCTTGGGCCTTATCCTAGAGTGAGCTTGATGGACCCAGAGTTAATAAGAGAAGTT  
CTATCAAACAAGTTTGGCCACTTTGTGAAGCCAACTTCAGTCCCCTTGTGAACTGTAG  
CCCAAGGGCTTGCAAGTCATGAAGGTGAGAAGTGGGCTAAACATAGGAGGATCATCAACC  
CTGCTTTCCATTTTGAAAACTAAAGTGCATGTTGCCGGCTTTTTCGACATGTTGTGATGAA  
CTAGTTAAGAGATGGCAGAACAAGATGAATGTAGAGGGTCCATTGAGCTGAATATGTGGC  
CAGAGCTCCAAAATCTTACTGGAGATGTCATCTCCAGGACTGCATTTGGTAGTTGCTACGAA  
GAAGGAAGAAGAATTTTCAACTCCAAACAGAGCAAGCTGAACTTATTATTCCAACCGCTC  
AGACTGTATATGTTCTGGTTTCAGGTTTTTACCAACACCAAAGAACAACAGAAGAAAAGC  
AATTGATAGAGAGATTAAAACAATTCTGAGAAGCATGATTGAAAAAAGAGAGAAGGCCATA  
AGAATGGGAGGAGAAACCAGCTGCAAGGATGACCTTCTGGGTTTGCTATTGGAGTCCAAC  
ATGAAGGAGACTGAACAACAAGGCAGGTCCAAAAACAAAGGGCTGACTACTGAGGACGT  
GATTGAAGAATGCAAGCTCTTCTACTTAGCAGGGCAAGAGACCACATCATCTCTTCTCACAT  
GGACAATGGTTTTGTTGAGCATGTATCCAACTGGCAGGCTAAAGCCAGAGAAGAAGTTCT  
CCAAGTCTTCGGGAAAAACAAACCCGACATGGACGGCGTCGGCCGCCTGAAGATCGTGAC  
GATGATACTGTATGAGGTTCTCAGATTATATCCACCAGCCATTTCACTGACAAGAAGAACAT  
ACAAAACAATGGAAGTGGGAGGGATAACTTATCCTCCAGGGGTGCTGCTCTTGTTACCCAT  
AATCTTGGTTCACCATGACTTGGATTTCTGGGGAGAAGATGCCAAAGAGTTTAAGCCGGAT  
AGGTTTGCAGAAGGGATATCAAAGGCATCCAAAGTTCCAGGAGCTTTCTTTCCTTTTGGTG  
GAGGTCCACGTATATGCATTGGCCAAAGCTTTGCACTCATTGAAGCTAAGCTGGGACTTAGC  
ATGATTCTTCAGAACTTCTCCTTTGAGCTCTCACCTTCTTATATCCATGCTCCTTACACTCTTG  
TACTCTTCAGCCTCAGCATGGAGCTCCAATCAAGCTGCACAAACTCTGA

**>DzCYP72A15**

ATGGAGCCGAGCTTCATCTCCATGGCAGCAACCCTATCATCCCTTCTGCTTCTCTACTGTGCT  
CTAACGGTGGTCCATGTTGTATGGTGGAGGCCAAGGATGATAGAGAAGCAGCTCAAGAAGC  
AAGGGATCAAGGGGAGGCCATACAAGGTTTTGCGTGGGGATCTCAGTGACATAGTCAAGAT  
CATGAAGGAGGCTTTGTCCAAACCCATGGAGCTTCATCACCATATCAGCCCCCGTGCTCTCC  
CCTTTGTCCACAGTACTGTGGAGCAATTTGGCAAATTATCAATAATTTGGTATGGGAAAAAT  
CCAAGGATAATCATACAAGATGTAGAACTGATAAAGGAAGTACTGGCAAACAAAAATGGGA  
ATTTTCTGAAGCCACTTCTGAATCCGCTCCAAAGACTATTAGCTGAGGGTGTTCCTTGTT  
GAGGGAGATAAATGGGTTCAACATAGAAACATACTAAATCCTGCATTCCATTTGGCCAAGTT  
GAAGGGGATGGTACCAGCATTTTGTACTAGTTGCAGTGAAATGATCAGTAAATGGGAAATG  
TTGTTTGGTCCTGAAGGATCTTGTGAAGTGGATGTTTGGATAGAGCTGAAAGCCCTAACAG  
CCGATGTTATATCTCGCACGGCATTGTTAGCAACTACAGAGAAGGGCAGAAGGTGTTTCA  
GTTTCAGCAGGAACAGATTCAACTCATGATGGAAGCCTCTTGGATTCCGTATATACCAGGAT  
TCAGGTTTTTGCCTACAAAGAAGAACCGGAGGAGGTACTATTTGGACAATGAGATTAAGGC  
AATAATAAGATCTTTGATTCACAAGAAAGAGAAGAGCATGGAAGTTGGTGAATCTGGTGGT  
GAAGATTTATTGTCCTTGTTGCTGCAATCAAATCATAATGTGCATGAAAATGCTGCAAATGGT  
TTGAAGCTTGAAGGATTGACAATTGATGAAGTGATTGAGGAATGCAAGCTCTTCTACTTTGC  
TGGTCATGATACGACTTCTAGTTTGCTGACCTGGACACTGATACTTTTATCAATGTATCCTGC  
TTGGCAAAC TAGAGCAAGAGAAGAGGTGCATCGAATTTGTGGGAAGAACATGCCAGACTA  
TGAAAGCATTTGGCCAATTTAAGATTGTGACGATGATATTGCACGAAGTTCTAAGATTATATCC  
ACCGGTAACAGGCCAGTATCGGCATGTGTACCACGAAACGAAGCTAGGGGAATTATCTCTT



AAGCTTCCCGCTCGATCTATCTTCCAGGCTTTAGGTTCCCTGCCAACTGCAAAGAATAAGAGG  
AGAATGTTTCATCGACAGTGAGATCAAAAGAATGCTACGAGATATCATCCACAAGAAGTTAG  
ATTCAATGAAAATCGGAGAAAACGCTGATGATGACTTACTCAGCTTGTTGTTGCAATCCGAT  
ACGATGAATGTTGTCGCTGAAGATAAAAAACAAGAACAATGGGATCACGATTGATGATG  
TAATAGAGGAATGCAAGTTGTTCTACTTCGCTGGCCAAGAGGGCACCTCAATTTTGCTTACC  
TGGACATTGATTCTCTTATCCATGTACCCTAGTTGGCAGAAGAAAGCAAGGGAGGAAGTTC  
TCAATAACTGCGGGAAGAACACACCTGAGTTCGAGAACATCAGCCACCTCAAGATTGTAAA  
CATGATATTACATGAAGTATTGAGGTTGTATCCACCTGGGGTCACACTGATTCGTTACATAAA  
CAAGAAAGTCAAAGTGGGAAATATAACATTACCTGCTGGAGCTGAAGTCTTGATACCTATTC  
TACAAGTACACCATGATCCAGAAATTTGGGGAGAAGATGCTGAAGAGTTCAAACCAGAGA  
GATTTTCAGAAGGGGTTTCAAATGCATCAAAGGGTCAGCAAGCATTCTTTCCTTTTGTTG  
GGCCCCAGAATATGTAGTGGGCAAACCTTCGCTATGATAGAAGCAAAGCTAGCTCTGGCAA  
TGGTGCTTCAAAATTTCTCCTTTGAACTCTCACCTTCCTATACTCATGCTCCTTACAATGTGA  
TAACCCTTCAGCCACAATATGGAGCTCATCTCATCCTACATCAACTCTGA

**>DzCYP72A18**

ATGAATGTTGCCACTGAAGATAAAAAACAAGAAAAACAATGGGATCACGATTGATGATGTAA  
TAGAGGAATGCAAGTTGTTCTACTTCGCTGGCCAAGAGACCACCTCAATTTTGCTTACCTGG  
ACATTGATTCTCTTATCCATGTACCCTACTTGGCAGAAGAAAGCTAGGGAGGAAGTTCTCAA  
TACCTGTGGGAAGAACACACCTGAGTTCGAGAACATCAGCCACCTCAAGATTGTAAACATG  
ATATTACATGAAGTATTGAGGTTGTATCCACCTGTGATCACACTGTTTCGTCACATAAACAAG  
AATGTCAAACCTGGGAGATATAACATTACCTGCTGGAGCTGAAGTCTTGATACCTATTCTACA  
AGTACACCATGATCCAGAAATTTGGGGGGAGGATGCTGAAGAGTTCAAACCAGAGAGATTT  
TCAGAAGGGGTTTCAAATGCATCAAAGGGTCAGAATGCATTCTTTCCGTTTGCTGGGGCC  
CAAGAATATTGATAGGTGTTCTAGGGAGAGTGTCACTTGGTATGGTGGAAGCCAAAAGAT  
GCTGGAGATGCAGCTGAGAAGACAGGGGTTGCCAGGAACAAGTATCGGCTGATGATGGGG  
GACATGAAGGATGAGAAAAAGTCCTTCAAGGAGGCTTGGTCCAGGCCAATGGAGCTCACG  
CACAGGATAGCGGCTCGTGTGATTCCCTATGATCATCAAATGGCTCAAACACATGGCAAGAT  
ATCATTCAAATGGAATGGAACAACTCCCAGAGTGAACATATGGAATCCAGAGATGTCGAGA  
GAGATCCTGTAAACAAGTCTGGCCACATTATCAAGCCACAACCTTAACCCTCTGATAAGGCT  
GCTTACAATGGGAGTATCTACACTTGAAGGAGAAGAATGGGCACAGAGGAGGAAGTTGAT  
CAATCCTGCCTTTCATATGGAGAACTCAAGGAGATGGTACCTGCTTTTCGAATCAGTTGCA  
TTGATTAGTCAAGAGGTGGGAGAACTTAGTGAGTGCCGAAGGATCCTGTGAACCTAGATGT  
CTGGCCTGAATTTCAAGAGTCTAACAGGAGATGTGATCTCTCGCACTGCATTTGGTAGTAGTT  
TTGAGGAAGGAAAGCAGATTTTGTAGTTCCAAAAGGAACAAGCTGTTCTTGTCAATTGAAGC  
TGCCCGCTCGATCTATCTTCCAGGCTTTAGGTTCCCTGCCAACTGCAAAGAATAAGAGGAGA  
ATGTTTCATCGACAGTGAGATCAAGAGAATGCTACGAGATATCATCCACAAGAAGATAGATTC  
AATGAAAATCGGAGAAAACACTGATGATGACTTACTCAGCTTGTTTATTTGCAATCCGATAC  
TATGA

**>DzCYP72A19**

ATGTACCCTACTTGGCAGAAGAAAGCTAGGGAGGAAGTTCTCAATACCTGTGGGAAGAAC  
ACACCTGAGTTCGAGAACGTCAGCCACCTCAAGATTGTAAACATGATATTACATGAAGTATT  
GAGGTTGTATCCACCTGTGATCACACTGTTTCGTCACATAAACAAGAATGTCAAACCTGGGA  
GATATAACATTACCTGCTGGAGCTGAAGTCGTGATACCTATTCTACAAGTACACCATGATCCA  
GAAATTTGGGGAGAAGATGCTGAAGAGTTCAAACCAGAGAGATTTTCAGAAGGGGTTTCA

AATGCATCAAAGGGTCAGAATGCATTCTTTCTTTTGGTTGGGGCCCAAGAATATGTATTGG  
GCAAACTTTCGCTATGATAGAAGCAAAGCTAGCTCTGGCAATGGTGCTTCAACATTTCTCCT  
TTGACCTCTCTCCTTCCTATACTCATGCTCCTTACACTGTAATAACCCTTCAGCCACAATATG  
GAGCTCATCTCATCCTACATCAACTCTGA

**>DzCYP72A20**

ATGGGGGTGCTATGGAGAGTGTTATACTTGGTATGGTGGAAGCCAAAGATGCTGGAGATGC  
AGCTGAAAAGGCAGGGGTTGCCGGGGAACAAGTATCGGCTGATGATGGGGGACATGAAGG  
ATGAGAAAAAGTCCTTCAAGGAGGCTTGGTCCAGGCCAATGGAGCTCACGCACAGGATAG  
CGGCTCGTGTGATTCCCTATGATCATCAAATAATGGCTCAAACACATGGCAAGATATCATTCA  
AATGGAAAGGGACAACCTCCCAGAGTGAACATATGGAATCCAGAGATGTTGAAAGAGATCC  
TGTTGAACAAGTCTGGCCACATTATCAAGCCACAAGTGAACCCTCTGATAAAGCTGCTTAC  
AATGGGAGTATCTACACTTGAAGGAGAAGAATGGGCACAGAGGAGGAAGTTGATCAATCC  
TGCCTTTCATATGGAGAACTCAAGGAGATGGTACCTGCTTTTCGAATCAGTTGCATTGATT  
TAGTCAAGAGGTGGGAGAACTTAGTGAGTGCCGAAGGATCCTGTGAACTAGATGTCTGGCC  
TGAATTCAGAGTCTAACAGGAGATGTGATCTCTCGCACTGCATTTGGTAGTAGTTTGGAGG  
AAGGAAAGCAGATTTTTGAACTCCAAAAGGAACAAGCTGTTCTTGTCAATTGAAGCTGCCCCG  
CTCGATCTATCTTCCAGGCTTTAGGTTCTTGCCAACCTGCAAAGAATAAGAGGAGAATGTTCA  
TCGACAGTGAGATCAAGAGAATGCTACGAGATATCATCCACAAGAAGATAGATTCAATGAA  
AATCGGAGAAAATACTGATGATGACTTACTCAGCTTGTGTTGCAATCCGATACGATGAATG  
TTGCCACTGAAGATAAAAACAAGAAAAACAATGGGATCACGATTGATGATGTAATAGAGGA  
ATGCAAGTTGTTCTACTTCGCTGGCCAAGAGACCACCTCAATTTTGCTTACCTGGACATTGA  
TTCTCTTATCCATGTACCCTACTTGGCAGAAGAAAGCTAGGGAGGAAGTTCTCAATACCTGT  
GGGAAAAACACACCTGAGTTCGAGAACATCAGCCACCTCAAGATTGTAAACATGATATTAC  
ATGAAGTATTGAGGTTGTATCCACCTGTGATCACACTGTTTCGTCACATAAACAAGAATGTC  
AAACTGGGAGATATAACATTACCTGCTGGAGCTGAAGTCTTGATACCTATTCTACAAGTACA  
CCATGATCCAGAAATTTGGGGGAGGATGCTGAAGAGTTCAAACCAGAGAGATTTTTCAGA  
AGGGGTTTCAAATGCATCAAAGGGTCAGAATGCATTCTTTCTTTTGGTTGGGGCCCAAGA  
ATATGTATTGGGCAAACCTTTCGCTATGATAGAAGCAAAGCTAGCTCTGGCAATGGTGCTTCA  
ACATTTCTCCTTTGACCTCTCTCCTTCCTATACTCATGCTCCTTACACTGTAATAACCCTTCAG  
CCACAATATGGAGCTCATCTCATCCTACATCAACTCTGA

**>DzCYP72A21**

ATGCTGGAGATGCAGCTGAGAAGACAGGGGTTGCCCCGGAACAAGTATCGGCTGATGATG  
GGGGACATGAAGGATGAGAAAAAGTCCTTCAAGGAGGCTTGGTCCAGGCCAATGGAGCTC  
ACGCACAGGATAGCGGCTCGTGTGATTCCCTATGATCATCAAATGGCTCAAACACATGGCAA  
GATATCATTCAAATGGAATGGAACAACCTCCCAGAGTGAACATCTGGAATCCAGAGATGTGCG  
AGAGAGATCCTGTTGAACAAGTCTGGCCACATTATCAAGCCACAACCTTAACCCTCTGATAA  
GGCTGCTTACAATGGGAGTATCTACACTTGAAGGAGAAGAATGGGCACAGAGGAGGAAGT  
TGATCAATCCTGCCTTTCATATGGAGAACTCAAGGAGATGGTACCTGTTTTTCGAATCAGT  
TGCATTGATTTAGTCAAGAGGTGGGAGAACTTGGTAGTGAGTGCCGAAGGATCCTGTGAAC  
TAGATGTCTGGCCTGAATTTTCAGAGTCTAACAGGAGATGTGATCTCTCGCACTGCATTTGGT  
AGTAGTTTTGAGGAAGGAAAGCAGATTTTTGAACTCCAAAAGGAACAAGCTGTTCTTGTCA  
TTGAAGCTGCCCCGCTCGATCTATCTTCCAGGCTTTAGGTTCTTGCCAACCTGCAAAGAATAAG  
AGGAGAATGTTTCATCGACAGTGAGATCAAGAGAATGCTACGAGATATCATCCACAAGAAGA  
TAGATTCAATGAAAATCGGAGAAAACACTGATGATGACTTACTCAGCTTGTGTTGCAATCC

GATACTATGAATGTTGCCACTGAAGATAAAAACAAGAAAAACAATGGGATCACGATTGATG  
ATGTAATAGAGGAATGCAAGTTGTTCTACTTTGCTGGCCAAGAGACCACCTCAATTTTGCTT  
ACCTGGACATTGATTCTTATCCATGTACCCTACTTGGCAGAAGAAAGCTAGGGAGGAAGT  
TCTCAATACCTTTGGGAAGAACACACCTGAGTTCGAGAACATCAGCCACCTCAAGATTGTA  
AACATGATATTACATGAAGTATTGAGGTTGTATCCACCTGTGATCACACTGTTTCGTACATA  
AACAAGAATGTCAAACCTGGGAGATATAACATTACCTGCTGGAGCTGAAGTCTTGATACCTAT  
TCTACAAGTACACCATGATCCAGAAATTTGGGGGGAGGATGCTGAAGAGTTCAAACCAGAG  
AGATTTTCAGAAGGGGTTTCAAATGCATCAAAGGGTCAGAATGCATTCTTTCTTTTGTTG  
GGCCCCAAGAATATGTATTGGGCAAACCTTCGCTATGATAGAAGCAAAGCTAGCTCTGGCA  
ATGGTGCTTCAACATTTCTCCTTTGACCTCTCTCCTTCCTATACTCATGCTCCTTACACTGTAA  
TAACCCTTCAGCCACAATATGGAGCTCATCTCATCCTACATCAACTCTGA

**>DzCYP72A22**

ATGCTGGAGATGCAGCTGAGAAGACAGGGGTTGCCGGGGAACAAGTATCGGCTGATGATG  
GGGGACATGAAGGATGAGAAAAAGTCCTTCAAGGAGGCTTGGTCCAGGCCAATGGAGCTC  
ACGCACAGGATAGCGGCTCGTGTGATTCCCTATGATCATCAAATGGCTCAAACACATGGCAA  
GATATCATTCAAATGGAATGGAACAACCTCCAGAGTGAACATCTGGAATCCAGAGATGTGCG  
AGAGAGATCCTGTTGAACAAGTCTGGCCACATTATCAAGCCACAACCTTAACCCTCTGATAA  
GGCTGCTTACAATGGGAGTATCTACACTTGAAGGAGAAGAATGGGCACAGAGGAGGAAGT  
TGATCAATCCTGCCTTTCATATGGAGAACTCAAGGAGATGGTACCTGTTTTTCGAATCAGT  
TGCATTGATTTAGTCAAGAGGTGGGAGAACCTTAGTGAGTGCCGAAGGATCCTGTGAACTAG  
ATGTCTGGCCTGAATTTAGAGTCTAACAGGAGATGTGATCTCTCGCACTGCATTTGGTAGT  
AGTTTTGAGGAAGGAAAGCAGATTTTTGAACTCCAAAAGGAACAAGCTGTTCTTGTCAATTG  
AAGCTTCCCGCTCGATCTATCTTCCAGGCTTTAGATTCCCTGCCAACTGCAAAGAATAAGAGG  
AGAATGTTTCATCGACAGTGAGATCAAAAGAATGCTACGAGATATCATCCACAAGAAGTTAG  
ATTCAATGAAAATCGGAGAAAACGCTGATGATGACTTACTCAGCTTGTTGTTGCAATCCAAT  
ACGATGAATGTTGCCGCTGAAGATAAAAACAAGAAGAACAATGGGATCACGATTGATGATG  
TAATAGAGGAATGCAAGTTGTTCTACTTCGCTGGCCAAGAGGGCACCTCAATTTTGCTTACC  
TGGACATTGATTCTTATCCATGTACCCTAGTTGGCAGAAGAAAGCAAGGGAGGAAGTTC  
TCAATAACTGCAGGAAGAACACACCTGAGTTCGAGAACATCAGCCACCTCAAAATTGTAAA  
CATGATATTACATGAAGTATTGAGGTTGTATCCACCTGGGGTCACACTGATTCGTTACATAAA  
CAAGAAAGTCAAAGTGGGAAATATAACATTACCTGCTGGAGCTGAAGTCTTGATACCTATTC  
TACAAGTACACCATGATCCAGAAATTTGGGGAGAAGATGCTGAAGAGTTCAAACCAGAGA  
GATTTTCTGAAGGGGTTTCAAATGCATCAAAGGGTCAGCAAGCATTCTTTCTTTTGTTGG  
GGCCCCAGAATATGTAGTGGGCAAACCTTCGCTATGATAGAAGCAAAGCTAGCTCTGGCAA  
TGGTGCTTCAAAATTTCTCCTTTGAACTCTCACCTTCCTATACTCATGCTCCTTACAATGTGA  
TGACCCTTCAGCCACAATATGGAGCTCATCTAATCCTACATCAACTCTGA

**>DzCYP72A23**

ATGGAGTCAGTGATGGGAGTGATATGGGCGGTGGCGGCGGTGGTGGTAGTGGCGGCGGGC  
TGAGAGGACATTGGATTGGATTTGGTGGACACCGAGGAGGCTGGACCGGGAGCTCCGGCGG  
CAGGGCCTGCGCGGCAACCAAGTACCGAGTCTTGACGCGCATCTCAAGGAAAACGTCCGG  
CTCTCGAAGGAGGCTAAATCCCGGCCTCTGCCTCTTCACTGCCATGACATCGCCCCCGCGT  
TCTCCCTCTCTTCCACAACGCCATCAAAGATCACGGTAAAATCTCAATAACTTTGGCTTGGCC  
CTTATCCAAGAGTGACCTTAACAGAGCCAGAGCTAGTAAAAGAAGTGCTGTCAAACAAGTT  
TGGACATTTTGTAAACCAACTACAAATCCCTTAGCCAAATTTTTGATCCAAGGGCTTGCCT

CTTATGAAGGTGAAAAGTGGGCCAAACACAGAAGGATCATCAACCCTGCATTCCATCTTGA  
GAAACTAAAGCTAATGCTGCCAGCATTCTCTACATCTTGTGGTGAAGTATTAGAAAGATGGG  
AGAAGATGATTCCCTAATGAAGGCTCCCAAGAACTAAATGTCTTTCCAGAGCTCCAAGACCT  
CACAAAAGATGTCATCTCCAGGACTGCATTTCGGTAGCAGTTATGAAGACGGAAGAAGAATA  
TTTGAAGTCTTAACAGAGCAAATTCAGCTTCTTATTCCAGCTTTCCAGACTGTATACATTCCCT  
GGTTATCGATTTCTGCCCACACCAATGAACAAAAGAAGCAGCCAAGTGTACAATGAGATGA  
AAAGAATTCTTATAGGCATGATTGAGAAGAGAGAGAAAAGGCCATAAGAATGGGGGAAAAGTA  
GCAAGAATGACCTTCTGGGTTTGTACTAGACTCCAATATCAAAGAGAGTGAAGTGCATGG  
GAAGTCCCAAAACAAAGGGATGAGCACTGAGGATGTGGTTGAAGAGTGCAAGCTGTTCTA  
CTTTGCAGGGCAAGAGACTACATCACTTCTACTCACATGGACAATGATTTTATTGAGCATGT  
ATCCAAATTGGCAGGCTAAGGCAAGAGAAGAGGTTCTTCAAGTCTTTGGAAAGAGCGCAC  
CAGATATGGAGGGATTGAGCCACTTGAAGATTGTGACCATGATTCTATATGAAGTTCTAAGG  
TTATATCCACCAGCGGTTTTCTTAACAAGAAAAACCTACAAAGCAATGGAAGTCCGGTGGA  
TTACTTACCCTCCAGGAGTGATACTCTCACTGCCTCTACTCTTCATTCACCATGACCCTGTTT  
TCTGGGGAGAAGACGCCAAAGAGTTTAATCCAGAGAGGTTTTCCGAAGGGATATCGAAAG  
CATCCAAAGTTCCGGGTGCCTTCTTTCCCTTCGGTGGAGGTCCGCGCATTTGCATTGGCCAA  
AACTTTGCTCTGATTGAAGCTAAGATAGGAATTTGCATGATTCTTCAGCACTTCTCCTTTGTG  
CTTTCGCCTTCCTATATCCATGCACCGCACAAATGTTATTACTCTTCAACCACAGCATGGAGCT  
CAACTCATGCTGCAAAAGGTGTGA

**>DzCYP72A24**

ATGGAGTTAGTGATGGGAGTGATATGGACGGTGACGGCGGCGGTGGTGGTGGTGTGGGCGT  
GGAGGACGTTGGATTGGGTTTGGTGGACGCCGAGGAGGCTGGACCGGGATCTCCGGCGCC  
AGGGCCTGCGCGGCAACCAGTACCGATTATTGCACGGCGATCTCAAGGAAAACGCCCGGCT  
CTCCAAGGAGGCTACATCCCGGCCCTTGCCTCTTCACTGCCATGAAATCGCTCCCAGGGTTG  
CCCCCTCTCATCCACAACGCCATCAAAGATCACGGTAAAATATCAATAACTTGGCTTGGACCT  
TATCCAAGAGTGTCTTGATGGACCCAGATTTAGTGAAAGAAGTACTATCAAACAAGTTTG  
GACATTTTGTTAAACCAAGAATAACTCCTATTGCCAAATTTTGGTCCAAGGACTTGTAGCT  
TATGAAGGTGAAAAGTGGGCCAAACACAGAAGGATAATTAACCCCGCATTCATCTTGAGA  
AACTAAAGCTAATGCTGCCAGCATTCTCTACATCTTCTGGTGAAGTATTAGAAAGATGGGAG  
AAGATGATCCCTGATGAAGGCTCCCAAGAACTAAATGTCTCGCCAGAGATCCAAAACCTCA  
CAGGAGATGTCATCTCCAGGACTGCATTTCGGTAGCAGCTATGAAGAAGGGAGAAGAATATT  
TGAAGTCTTAACAGAGCAAATTCATCTTACTATTCCAGCTTTGCAGACTGTATACATCCCTGG  
TTATCGGTTTCTGCCCACACCAATGAACAAACAGAAGAAGCCAAGTTTACAATGAGATGAAA  
AGAATTCTTAAAGGCATGATTGAGAAGAGAGAGAGAAGGCCATAAGAATGGGGGAAAAGTAGC  
AAGAATGACCTTCTGGGTTTGTACTAGACTCCAATATGAAGGAGGGTGAAGAGCAGGAGA  
AGTCCCAAAACAAAGTGATGAGCACTGAGGATGTGATTGAAGAGTGCAAGCTGTTCTACTT  
TGCAGGGCAAGAGACTACATCAGTTCTACTCACATGGACAATGATTTTATTGAGCATGTATC  
CTAACTGGCAGGCCAAGGCAAGAGAAGAGGTTCTTCAAGTCTTTGGAAAGAGCACACCAG  
ACATGGATGGATTGAGCCGCTTGAAGATTGTGACCATGATTCTGTATGAAGTTCTGAGGTTA  
TATCCACCGGTGACTTTCCTAACAAGAAAAACATACAAAGCAATGGAAGTGGTGGGATCA  
ATTACCTCCAGGAGTGTTACTCCAAGTGCCTCTACTCTTCATTCACCATGACCCTGAATTCT  
GGGGAGAAGACGCCAAAGAGTTCAATCCCGAGAGGTTTTCTGAAGGGATATTGAAAGCAT  
CCAAAGTTCCGGGTGCCTTCTTTCCCTTCGGTGGAGGTCCGCGCATTTGCATTGGCCAAAG  
CTTTGCACTGATTGAAGCTAAGATTGGAATTAGCATGATTCTTCAGCACTTCTCCTTCGAGC

TCTCGCCTTCGTATATCCATGCACCGCACACTCCTCTTACTCTTCAACCACAGCATGGAGCT  
CAACTCATGCTTCAAAAACTCTGA

**>DzCYP72A25**

ATGGAGTACTCAGTGGCGGCAGGGGTGAAGGAGATGATATGGGGTGTGGCAACGGCGCTG  
TTGGTGGTGTGGGTGTGGAGGACGTTGGAGTGGTTGTGGTGGAAGCCGAGGAGGCTGGAG  
CGCGAGCTGAAGAGGCAGGGATTGCGCGGAGGCAAGTACCGTCTCTTCCACGGCGATCTC  
AAGGACAACGCGCGACTCATGAAGGATGCTCTTTCTCGCCCCCTTGCCCCCTTACTCTCACG  
ACGTCGCCCCAACGAGTCATCCCTCTCGTCCATCAAGCTATCAAGATTCATGGTAAAATGTCT  
ATAACATGGCTTGGGCCTTATCCTAGAGTGAGCTTGATGGACCCAGAGTTAATAAGAGAAGT  
TCTATCAAACAAGTTTGGCCACTTTGTGAAGCCAAACTTCAGTCCCCCTTGTGAAACTGTTA  
GCCCAAGGGCTTGCAAGTCATGAAGGTGAGAAGTGGGCTAAACATAGGAGGATCATCAAC  
CCTGCTTTCCATTTTGAAAACTAAAGTGCATGTTGCCGGCTTTTTTCGACATGTTGTGATGA  
ACTGGTTAAGAGATGGCAGAACAAAGATGAATGTAGAGGGTTCCATTGAGCTGAATATGTGG  
CCAGAGCTCCAAAATCTTACTGGAGATGTCATCTCCAGGACTGCATTTGGTAGTTGCTACGA  
AGAAGGAAGAAGAATTTTTCAACTCCAAACAGAGCAAGCTGAACTTATTATTCCAACCGCT  
CAGACTGTATATGTTCTTGGTTTCAGGTTTTTACCAACACCAAAGAACAACAGAAGAAAAG  
CAATTGATAGAGAGATTAATAACAATTCTGAGAAGCATGATTGAAAAAAGAGAGAAGGCCAT  
AAGAATGGGAGGAGAAACCAGCTGCAAGGATGACCTTCTGGGTTTGCTATTGGAGTCCAA  
CATGAAGGAGACTGAACAACAAGGCAGGTCCAAAAACAAAGGGCTGACTACTGAGGACG  
TGATTGAAGAATGCAAGCTCTTCTACTTAGCAGGGCAAGAGACCACATCATCTCTTCTCACA  
TGGACAATGGTTTTGTTGAGCATGTATCCAACTGGCAGGCTAAAGCCAGAGAAGAAGTTC  
TCCAAGTCTTTGGGAAAAACAAACCCGACATGGACGGCGTCGGCCGCCTGAAGATCGTGA  
CGATGATACTGTATGAGGTTCTCAGATTATATCCACCAGCCATTTTCCTGACAAGAAGAACAT  
ACAAAACAATGGAAGTGGGAGGGATAACTTATCCTCCAGGGGTGCTGCTCTTGTTACCCAT  
AATCTTGGTTCACCATGACTTGGATTTCTGGGGAGAAGATGCCAAAGACTTTAAGCCGGAT  
AGGTTTGCAGAAGGGATATCAAAGGCATCCAAAGTTCCAGGAGCTTTCTTTCCATTTGGTG  
GAGGTCCACGTATATGCATTGGCCAAAGCTTTGCACTCATTGAAGCTAAGCTGGGACTTAGC  
ATGATTCTTCAGAACTTCTCCTTTGAGCTCTCACCTTCTTATATCCATGCTCCTTACACTCTTG  
TACTCTTCAGCCTCAGCATGGAGCTCCAATCAAGCTGCACAAACTCTGA
