# Supplementary material for: Genome-Wide Identification of CYP72A Gene Family and Expression Patterns Related to Jasmonic Acid Treatment and Steroidal Saponin Accumulation in Dioscorea zingiberensis
Source: MDPI journal article supplement (doi:10.3390/ijms222010953), 2021-10-11
Supplement: s1 [file s1]

## **The amino acid sequences of *DzCYP72A* gene family**

### **>DzCYP72A1**

MESVMGVVWAAA AVAVVAWAWRTLDWVWWKPRRLDRELRRQGLRGNQYRLLHGDLEKNA  
RLSEKAKSRPLPLHCHDIAPRVLPVLHNAIKDHGKISITWFGPYPRVTLMEPELVKEVLSNKFGE  
FAKIRATPLANFLVQGLVTYEGEKWAKHRRINPAFHLEKLEKLMPLAFSTSCGELIRRWEKMIPD  
EGSQELKCLSRAPRPHKRCHLQDCIRSSYEGRIFELLAEQIQLLIPAFQTIYIPGYRFLPTPMN  
KRRSQVYNEMKRILKGMIEKREKAIRMGDSSKNDLLGLLLDSNMKEGEEHGKSQNKGMSTE  
DVIEECKLFYFAGQETTAVLLTWTMILLSMYPNWQAKAREEVQLQVFGKNTPDMEGLSHLKIVT  
MILYEVLRLYPPFVLLRRKTYKAMELGHIYPPGVMLSLPLLFIHHDPAFWGEDAKEFNPERFSE  
GISKASKVPGAFFPFGGGPRICIGQSFAMIEAKIGICMILQCFSFELSPSYIHAPHTVITLQPQHG  
QLMLQKL

### **>DzCYP72A2**

MESVMGVVWAAA AVAVVAWAWRTLDWVWWTPRRLDRELRRQGLRGNQYRVLHGDLEK  
NARLSEEAKSRPLPLHCHDIAPRVLPVLHNAIKDHGKISITWFGPYPRVTLMEPELVKEVLSNKF  
GHFAKVRPNPLTKLLVQGLVVYEGEKWAKHRRINPAFHLEKLEKLMPLAFSTSCGELIRRWEKM  
IPDEGSHELNVFPELQDLTKDVISRTAFGSSYEGRIFELLAEQIQLLIPAFQTIYIPGYRFLPTPM  
NKRRSQVYNEMKRILKGMIEKREKAIRMGDSSKNDLLGLLLDSNMKEGEEHGKSQNKGMST  
EDVIEECKLFYFAGQETTAVLLTWTMILLSMYPNWQAKAREEVQLQVFGKSTPDMEGLNHLKIV  
TMILYEVLRLYPPFVFLTRKTYKAMELGGITYPQGVILSLPLLFIHHDPAFWGEDAKEFNPERFS  
EGISKASKVPGAFFPFGGGPRICIGQSFAMIEAKIGICMILQRFSEFELSPSYIHAPHTVITLQPQHG  
AQLMLQKL

### **>DzCYP72A3**

MELVMGVVWAA AVAVVAWAWRTLDWVWWTPRRLDRELRRQGLRGNQYRLLHGDLEKNAQL  
SDEAKSRPLPLHCHDIAPRVLPFLHNAIKDHGKISITWLGYPYPRVILAEPPELVKEVLSNKFGEH  
FKPSTTPLAKFLVQGLASYDGEKWVKHRRINPAFHFEKLEKLMPLAFSTSCGELIRRWNKMIPDE  
GSQELNVFPELQGLTKDIISRTAFGSSYEGRIFELLTEQIKLTIPAFKTVYIPGYRFLPTPMNKR  
RSQVYNEMKRILKGMIEKREKAIRMGESSKNDLLGLLLDSNMKEGEEHGKSQDKGMSTEDVI  
EIECKLFYIAGQETTSALLTWTMILLSMYPNWQANAREEVQLQVFGKSTPDIEGLSHLKIVTMILY  
EVLRLYPPGVFLDRKTYKAMELGGITYPGVSILSLPLLFIHNDPTFWGEDAKEFNPERFSEGISK  
ASKVPGAFFPFGGGPRICIGQNFALMEAKIGICMIIQHFSFVLSPSYIHAPHSVITLQPQHG  
AQLMLQKL

### **>DzCYP72A4**

MELVMGVVWAA AVVMLVAWAWRTLDWVWRTPMRLDRELRRQGLRGNQYRVFHGDLEKNA  
RLSKEAESRPLPLHCHDIAPRVLPFLHNAIKDHGKISITWLGPCPRVTLTEPELVKEVLNKFGEH  
VKPSTTPFAKFLVQGLVYYEGEHWAKHRRILNPAFHLEKLEKLMPLAFSTSCSELIRRWEKMIPD  
EGSQELNVFPELQGLTKDVISRTAFSSSYEGRIFELLKEQIQLYIQVYKTVYIPGYRFLPTPMN  
KRRSQVYNEMKRILKGMIGEERKKGHNKESCKDDLLGLLLDSNMKEGEEHGKSQNKGMSTE  
EVIEECKLFYFAGQETTPSLLLTWTMILLSMYPNWQTKAREEVQLQVFGKNTPDMEGLSHLKIV  
TMILYEVLRLYPPVFITRKYKAMELGGITYPGVIFSLPLLFIHHDPTFWGEDAKEFNPERFSE  
GISKASKVPAAFFPFGGGPRICIGQNFALIEAKIGICMILQHFSFVLSLLSYIHAPHTVITLQPEHG  
AQLMLQKL

### **>DzCYP72A5**

MESVMGVVWAAA AVAVVAWAWRTLDWVWWTPRRLDRELRRQGLRGNQYRVLHGDLEKNT  
RLSEEAKSRPLPLHCHDIAPRVLPVLHNAIKDHGKISITWFGPYPRVTLMEPELVKEVLSNKFGEH

FAKVRPNPLTKLLVQGLVVYEGEKWAKHRRINPAFHLEKLLMLPAFSTSCGELIRRWEKMIP  
DEGSHELNVFPELQDLTKMSSPGLHSVAAMKKEGRRIFELLAEQIQLLIPAFQTLIPGYRFLPTP  
MNKRRSQVYNEMKRILKGMIEKREKAIRMGEGSKNDLLGLLLDSDNIKESEEHGKSQNKVMST  
EDVIEECKLFYFAGQETTSLLLTWTMILLSMYPNWQAKAREEVQVFGKNTPDMEGLSHLKIV  
TMILYEVLRLYPPFVLLRRKTYKAMELGGITYPPGVILSLPLLFIHHDPAFWGEDAKEFNPERFS  
EGISKASKVPGAFFPFGGGPRICIGQSFAMIEAKIGICMILQCFSFELSPSYIHAPHTVITLQPQHG  
AQLMLQKL

**>DzCYP72A6**

MELVMGVVWAAVAVVAWAWRTLWDVWWTPRRLDRELRRQGLRGNQYRVLHGDLENKNAQL  
SEEAKSRPLPLHYHDIAPRVLPLFHNAIKDHEPELVKEVLSNKFHGFVKPSTTPLAKFLVQGLAS  
YDGEKWVKHRRINPAHFHEKLLQMLPAFSTSCGELIRRWNKMIPDEGSQELNVFPELQGLTKD  
IISRTAFGSSYEEGRRIFELLTEQIKLTIPAFKTVYIPGYRFLPTPMNKRRSQVYNEMKRILKGMIE  
KREKAIRMGESSKNDLLGLLLDSDNMQEGEEHVKSQDKGMSTEDVIEECKLFYIAGQETTSALL  
TWTMILLSMYPNWQANAREEVQVFGKSTPDIEGLSHLKIVTMILYEVLRLYPPGVFLDSKTSK  
AMELGGITYPSGVILSLPLLFIHNDPTFWGEDAKEFNPERFSEGISKASKVTGAFFPFGGGPRICI  
GQNFALMEAKIGICMIIQHFSFVLSPSYIHAPHSVITLQPQHGGAQLMLQKL

**>DzCYP72A7**

MRLDRELRRQGLRGNQYRVFHGDLKENARLSKEAESRPLPLHCHDIAPRVLPLFHNAIKDHGK  
ISITWLGPCPRVTLTPELVKEVLNKFHGFVKPSTTPFAKFLVQGLVSYEGEKWAKHRRILNPAF  
HLEKLNLMPLAFSTSCSELIRRWEKMIPDEGSQELNVFPELQGLTKDVISRTAFSSSYEEGRRIFE  
LLKEQIQLYIQVYKTVYIPGYRFLPTPMNKRRSQVYNEMKRILKGMIEKREKAIRMGESCKDD  
LLGLLLDSDNMKEGEEHGKSQNKGMSTEEVIEECKLFYFAGQETTSLLLTWTMILLSMYPNWQT  
KAREEVLVFGKNTPDMEGLSHLKIVTMILYEVLRLYPPVVFITRKYKAMELGGITYPPGVIF  
SLPLLFIHHDPTFWGEDAKEFNPERFSEGISKASKVPAAFFPFGGGPRICIGQNFALIEAKIGICMI  
LQHFSFVLSLSYIHAPHTVITLQPEHGAQLMLQKL

**>DzCYP72A8**

MESVMGVVWAAA VAVVAWAWRTLWDVWWKPRRLDRELRRQGLRGNQYRLLHGDLENARL  
RLSEEAKSRPLPLHCHDIAPRVLPLHNAIKDHGKISITWFGPYPRVTLMPELVKEVLSNKFH  
FAKIRATPLANFLVQGLVTYEGEKWAKHRRINPAFHLEKLLMLPAFSTSCGELIRRWEKMIPD  
EGSQELNVFPELQDLTKDVISRTAFGSSYEEGRRIFELLAEQIQLLIPAFQTIYIPGYRFLPTPMNK  
RRSQVYNEMKRILKGMIEKREKAIRMGEGSKNDLLGLLLDSDNIKESEEHGKSQNKVMSTEDVI  
EECKLFYFAGQETTSLLLTWTMILLSMYPNWQGKAREEVQVFGKSTPDMEGLNHLKIVTMIL  
YEVLRLYPPFVFLTRKTYKAMELGGITYPQGVILSLPLLFIHHDPAFWGEDAKEFNPERFSEGIS  
KASKVPGAFFPFGGGPRICIGQSFAMIEAKIGICMMLQRFSFELSPSYIHAPHTVITLQPQHGGAQL  
MLQKL

**>DzCYP72A9**

MESVMGVVWAAA VAVVAWAWRTLWDVWWTPRRLDRELRRQGLRGNQYRVLHGDLENARL  
NARLSEEAKSRPLPLHCHDIAPRVPLHNAIKDHGKISITWFGPYPRVTLMPELVKEVLSNKF  
GHFAKVRPNPLTKLLVQGLVVYEGEKWAKHRRINPAFHLEKLLMLPAFSTSCGELIRRWEKM  
IPDEGSHELNVFPELQDLTKDVISRTAFGSSYEEGRRIFELLAEQIQLLIPAFQTIYIPGYRFLPTPM  
NKRRSQVYNEMKRILKGMIEKREKAIRMGDSSKNDLLGLLLDSDNMKEGEEHGKSQNKGMST  
EDVIEECKLFYFAGQETTAVLLTWTMILLSMYPNWQGKAREEVQVFGKSTPDMEGLNHLKIV  
TMILYEVLRLYPPFVFLTRKTYKAMELGGITYPQGVILSLPLLFIHHDPAFWGEDAKEFNPERFS  
EGISKASKVPGAFFPFGGGPRICIGQSFAMIEAKIGICMILQRFSFEL

**>DzCYP72A10**

MELVMRVVWAVAAVAVAWWRTLDWVWWTPRRLDRELRRQGLRGNQYRLLHGDLKENAQ  
LSEEAksRPLPLHYHDIAPRVLPLFHNAIKDHGKISITWLGPyPRVILTEPELVKEVLSNKFGHFV  
KPSTTPLAKFLVQGLASYDGEKWVKHRRINPAHFHEKLLKQMLPAFSTSCGELIRRWNKMIPDE  
GSQELNVFPELQGLTKDIISRTAFGSSYEEGRRIPELLTEQIKLTIPAFKTVYIPGYQFLPTPMNKR  
RSQVYNEMKRILKGMIEKREKAIRMGESSKNDLLGLLDSNMQEGEEHGKSQDKGMSTEDVI  
EECKLFYIAGQETTSALLTWTMILLSMYPNWQANAREEVLQVFGKSTPDIEGLSHLKIVTMILY  
EVLRLYPPGVFLDRKTYKAMELGGITYPSGVLSLPLLFHNDPTFWGEDAKEFNPERFSEGISK  
ASKVPGSFLPYGVGPRICIGQNFALMEAKIGICMIIQHFSFVLSPSYIHAPHSVITLQPQHGAQLM  
LQKL

**>DzCYP72A11**

MELVMGVVWAAAVVMLVAWAWRTLDWVWWTMRLDRELRRQGLRGNQYRVFHGDLKENA  
RLSKEAESRPLPLHCHDIAPRVLPLFHNAIKDHGKISITWLGPyPRVTLTEPELVIEVLNKFGHFV  
KPSTTPFAKFLVQGLVSYEGEKWAKHRRILNPAFHLEKLLKMLPAFSTSCSELIRRWEWKIPDEG  
SQELNVFPELQGLTKDVISRTAFSSSYEEGRRIPELLKEQIQLYIQVYKTVYIPGYRFLPTPMNKR  
RSQVYNEMKRILKGMIEKREKAIRMGESCKDDLGLLLDSNMKEGEEHGKTQNGKMSTEEVI  
EECKLFYFAGQETTSLLLTWTMILLSMYPNWQAKAREEVLQVFGKNTPDMEGLSHLKIVTMIL  
YEVLRLYPPVFLTRKTYKAMELGGITYPPGVIFSLPLLFHHDPTFWGEDAKEFNPERFSEGIS  
KASKVSAAFFPFGGGPRICIGQNFALIQAKIGICMILQHFSFVLSLSYIHAPHTVITLQPQHGAQL  
MLQKL

**>DzCYP72A12**

MESLMGVIWAVAAVVVVAAAWRTLDWIWWTPRRLDRELRRQGLRGNQYRVLHGDLKENVR  
LSKEAKSRPLPLHCHDIAPRVLPLFHNAIKDHGKISITWLGPyPRVTLTEPELVKEVLSNKFGHF  
VKPTTTPLAKFLVQGLVSYEGEKWAKHRRINPAFHLEKLLKMLPAFSTSSGELIRRWEKMIPNE  
GSQELNVFPELQDLTKDVISRTAFGSSYEDGRRIFELLTEQIQLLIPAFQTVYIPGFRFLPTPMNKR  
SSQVYNEMKRILIGMIEKREKAIRMGESNKNDDLGLLLDSNMKEGEEHRKSQNGKMSTEDVIE  
ECKLFYFAGQETTSVLLTWTMILLSMYPNWQAKAREEVLQVFGKSAPDMEGLSHLKIVTMILY  
EVLRLYPPAVFLTRKTYKAMELGGITYPPGVLSLPLLFHHDVPFWGEDAKEFNPERFSEGISK  
ASKVPGAFFPFGGGPRICIGQNFALIEAKIGICMILQHFSFVLSPSYIHAPHNVITLQPQHGAQLM  
LQKL

**>DzCYP72A13**

MELVMGVIWTVTAAVVVVWAWRTLDWVWWTPRRLDRDLRRQGLRGNQYRLLHGDLKENA  
RLSKEATSRPLPLHCHDIAPRVAPLIHNAIKDHGKISITWLGPyPRVSLMDPDLVKEVLSNKFGH  
FVKPRITPIAKFLVQGLVAYEGEKWAKHRRINPAFHLEKLLKMLPAFSTSSGELIRRWEKMIPDE  
GSQELNVSPEIQNLTDVISRTAFGSSYEEGRRIPELLTEQIHLTIPALQTVYIPGYRFLPTPMNNR  
RSQVYNEMKRILKGMIEKREKAIRMGESSKNDLLGLLDSNMKEGEEQEKSNKVMSTEDVI  
EECKLFYFAGQETTSVLLTWTMILLSMYPNWQAKAREEVLQVFGKSTPMDGLSRLKIVTMIL  
YEVLRLYPPVTFLTRKTYKAMELGGINYPGVLLQLPLLFHHDPEFWGEDAKEFNPERFSEGIL  
KASKVPGAFFPFGGGPRICIGQSFALIEAKIGISMILQHFSFVLSPSYIHAPHTALTLPQHGAQL  
MLQKL

**>DzCYP72A14**

MEYSVAAGVKEMIWGVATALLVVVWVWRTLEWLWWKPRRLERELKRQGLRGGKYRLFHGD  
LYNARLMKDALSRLPPYSHDVAPRVIPLVHQAIIHGKMSITWLGPyPRVSLMDPELIREVLS  
NKFGHFVKPNFSPLVKLLAQGLASHEGEKWAKHRRINPAHFHEKLLCMLPAFSTCCDELVKR

WQNKMNVEGSIELNMWPELQNLTDGDISRTAFGSCYEEGRRIQFQLQTEQAELIPTAQTVYVPG  
FRFLPTPKNNRRKAIDREIKTILRSMIEKREKAIRMGGGETSCKDDLLGLLLESNMKETEQQGRS  
KNKGLTTEDVIEECKLFYLAGQETTSSLLTWTMVLLSMYPNWQAKAREEVLQVFGKNKPD  
DGVGRLKIVTMILYEVRLRYPALSLTRRTYKTMELGGITYPPGVLLLLPIILVHHDLDLFWGEDA  
KEFKPDRFAEGISKASKVPGAFFPFGGGPRICIGQSFALIEAKLGLSMILQNFSFELSPSYIHAPYT  
LVTLPQPHGAPIKLHL

**>DzCYP72A15**

MEPSFISMAATLSSLLLLYCALTVVHVWWRPRMIEKQLKKQGIKGRPYKVLRGDLSDIVKIM  
KEALSKPMELHHHISPRALPFVHSTVEQFGKLSIIWYGKNPRIHQDVELIKEVLANKNGNFLKP  
LLNPLQRLLAEGVSLVEGDKWVQHRNILNPAFHLAKLKGMVPAFCTSCSEMISKWEMLFGPE  
GSCELDVWIELKALTADVISRTAFGSNYREGQKVFEFQEQIQLMMEASWIPYIPGFRFLPTKK  
NRRRYLDNEIKAIIRSLIHKKEKSMEVGESGGEDLLSLLQSNHNVHENAANGLKLEGLTIDE  
VIEECKLFYFAGHDTTSSLLTWTLLSMYPAWQTRAREEVHRCGKNMPDYESIGQFKIVTMIL  
HEVRLRYPVGTGQYRHVYHETKLGELSLPAGVDLFPVSLVYHDPEIWGEDCKEFPNPRFSEG  
VLKATKNQFVYFPFGFGQRTCIGQNFAMIEAKIALAMMLQHFSFDLSPSYAHCPYSLITLQPQH  
GAQLIVHRL

**>DzCYP72A16**

MVVVVVVSLSLVIVGLVARVSWIWWKPKMMEKEMRRQGINGTKYRTFMGDLKDEGEAYK  
EAWSKPMDLNHNIVPRVLPHAHMLQTYGKTSFKWMGTTPAVTIWEPELLREVLMNKCGRHFV  
QPQVNPLIKLLANGINSLEGEQWAQRRKMIKPAFHIDKLKEMVPTFITSCSELIERWKLLTDET  
SCELDVWPEFQNLTDASIRILFGNSFEEGKRIFELQKEQIVLAIDAASSIYVPGFRFLPTTKNRR  
MFIDNEIKRILQDIINNKLKESMKMGGNANSDILSLMLQYGNINIAEKEKNTNNSKITIDNVIEEC  
KGFYFAGQDSTTLLTWTLLSMHPTWQQAAREEVLRTCGKNTPNFESINHLKIVNMILHEVL  
RLYPPVITQIRHTEKKTKLGDITLPAGVHVLIPTLQVHHDQEFWGEDAEFNPFRFSEGVSKASK  
GQNAFLPFGWGPRMCLGQAFAMIEKTLGLAMVLQHFSFELSPSYAHAPSIVATLQPQLGAHLIL  
HQL

**>DzCYP72A17**

MLEMQLRRQGLPGNKYRLMMGDMKDEKKSFEAWSRPMELTHRIAARVIPYDHQMAQTHG  
KISFKWNGTTPRVNIWNPEMSREILLNKSGHIIKPQLNPLIRLLTMGVSTLEGEWAQRRKLINP  
AFHMEKLKEMVVPFRISCIDLKRWENLVSAEGSCELDVWPEFQSLTGDVISRTAFGSSFEEGK  
QIFELQKEQAVLVIEASRSIYLPGRFLPTAKNKRRMFIDSEIKRMLRDIIHKKLDSMKIGENADD  
DLSLLQSDTMNVVAEDKNKKNNGITIDDVIEECKLFYFAGQEGTSILLTWTLLSMYPSWQ  
KKAREEVLNCGKNTPEFENISHLKIVNMILHEVRLYPPGVTLIRYINKKVKGVNITLPAGAEV  
LIPILQVHHDPEIWGEDAEFEKPERFSEGVSNASKGQQAFFPFGWGPRICSGQTFAMIEAKLAL  
AMVLQNFSFELSPSYTHAPYNVITLQPQYGAHLILHQL

**>DzCYP72A18**

MNVATEDKNKKNNGITIDDVIEECKLFYFAGQETTSSILLTWTLLSMYPTWQKKAREEVLNTC  
GKNTPEFENISHLKIVNMILHEVRLYPPVITLFRHINKNVKLGDITLPAGAEVLIPILQVHHDPEI  
WGEDAEFEKPERFSEGVSNASKGQNAFFPFGWGPRILIGVLGRVSILVWVKPKDAGDAAEKT  
GVARNKYRLMMGDMKDEKKSFEAWSRPMELTHRIAARVIPYDHQMAQTHGKISFKWNGTT  
PRVNIWNPEMSREILLNKSGHIIKPQLNPLIRLLTMGVSTLEGEWAQRRKLINPAFHMEKLKE  
MVPAFRISCIDLKRWENLVSAEGSCELDVWPEFQSLTGDVISRTAFGSSFEEGKQIFEFQKEQA  
VLVIEAARSIIYLPGRFLPTAKNKRRMFIDSEIKRMLRDIIHKKIDSMKIGENTDDDLLSLFICNPI  
L

**>DzCYP72A19**

MYPTWQKKAREEVLNTCGKNTPEFENVSHLKIVNMILHEVLRLYPPVITLFRHINKNVKLGDIT  
LPAGAEVVIPILQVHHDPEIWGEDAEFEKPERFSEGVSNASKGQNAFFPFGWGPRICIGQTFAMI  
EAKLALAMVLQHFSFDLSPSYTHAPYTVITLQPQYGAHLILHQL

**>DzCYP72A20**

MGVLWRVLYLVWWKPKMLEMQLKRQGLPGNKYRLMMGDMKDEKKSFEAWSRPMELTHR  
IAARVIPYDHQIMAQTHGKISFKWKGTTPRVNIWNPEMLKEILLNKSGHIIKPQVNPLIKLLTMG  
VSTLEGEewaQRRKLINPAFHMEKLKEMVPAFRISCIDLVRWENLVSAEGSCELDVWPEFQSL  
TGDVISRTAFGSSFEEGKQIFELQKEQAVLVIEAARSIYLPGFRFLPTAKNKRRMFIDSEIKRMLR  
DIIHKKIDSMKIGENTDDDLLSLLLQSDTMNVATEDKNKKNNGITIDDVIEECKLFYFAGQETTS  
ILLTWTLLSSMYPTWQKKAREEVLNTCGKNTPEFENISHLKIVNMILHEVLRLYPPVITLFRHIN  
KNVKLGDITLPAGAEVLIPILQVHHDPEIWGRMLKSSKPERFSEGVSNASKGQNAFFPFGWGPR  
ICIGQTFAMIEAKLALAMVLQHFSFDLSPSYTHAPYTVITLQPQYGAHLILHQL

**>DzCYP72A21**

MLEMQLRRQGLPGNKYRLMMGDMKDEKKSFEAWSRPMELTHRIAARVIPYDHQMAQTHG  
KISFKWNGTTPRVNIWNPEMSREILLNKSGHIIKPQLNPLIRLLTMGVSTLEGEewaQRRKLINP  
AFHMEKLKEMVVPFRISCIDLVRWENLVVSAEGSCELDVWPEFQSLTGDVISRTAFGSSFEEG  
KQIFELQKEQAVLVIEAARSIYLPGFRFLPTAKNKRRMFIDSEIKRMLRDIIHKKIDSMKIGENTD  
DDLLSLLLQSDTMNVATEDKNKKNNGITIDDVIEECKLFYFAGQETTSILLTWTLLSSMYPTW  
QKKAREEVLNTFGKNTPEFENISHLKIVNMILHEVLRLYPPVITLFRHINKNVKLGDITLPAGAE  
VLIPILQVHHDPEIWGEDAEFEKPERFSEGVSNASKGQNAFFPFGWGPRICIGQTFAMIEAKLAL  
AMVLQHFSFDLSPSYTHAPYTVITLQPQYGAHLILHQL

**>DzCYP72A22**

MLEMQLRRQGLPGNKYRLMMGDMKDEKKSFEAWSRPMELTHRIAARVIPYDHQMAQTHG  
KISFKWNGTTPRVNIWNPEMSREILLNKSGHIIKPQLNPLIRLLTMGVSTLEGEewaQRRKLINP  
AFHMEKLKEMVVPFRISCIDLVRWENLVSAEGSCELDVWPEFQSLTGDVISRTAFGSSFEEGK  
QIFELQKEQAVLVIEASRSIYLPGFRFLPTAKNKRRMFIDSEIKRMLRDIIHKKLDSMKIGENADD  
DLLSLLLQSNMTMNVAAEDKNKKNNGITIDDVIEECKLFYFAGQEGTSILLTWTLLSSMYPSWQ  
KKAREEVLNNCRKNTPEFENISHLKIVNMILHEVLRLYPPGVTLIRYINKKVKGVNITLPAGAEV  
LIPILQVHHDPEIWGEDAEFEKPERFSEGVSNASKGQQAFFPFGWGPRICSGQTFAMIEAKLAL  
AMVLQNFSFELSPSYTHAPYNVMTLQPQYGAHLILHQL

**>DzCYP72A23**

MESVMGVIWAVAAVVVVAAAWRTLWDWIWWTPRRLDRELRRQGLRGNYRVLHGDLKENVR  
LSKEAKSRPLPLHCHDIAPRVLPFLHNAIKDHGKISITWLGYPYPRVTLTEPELVKEVLSNKFGHF  
VKPTTNPLAKFLIQGLASYEGEKWAKHRRRIINPAFHLEKCLKMLPAFSTSCGELIRRWEKMIPNE  
GSQELNVFPELQDLTKDVISRTAFGSSYEDGRRIFELLTEQIQLLIPAFQTVYIPGYRFLPTPMNK  
RSSQVYNEMKRILIGMIEKREKAIRMGESSKNDLLGLLLDSNIKESEVHGKSQNKGMSTEDVV  
EECKLFYFAGQETTSLLLWTMILLSMYPNWQAKAREEVLQVFGKSAPDMEGLSHLKIVTMIL  
YEVLRLYPPAVFLTRKTYKAMELGGITYPPGVILSLPLLFIHHDVPVFWGEDAKEFNPERFSEGIS  
KASKVPGAFFPFGGGPRICIGQNFALIEAKIGICMILQHFSFVLSPSYIHAPHNVITLQPQHGAQL  
MLQKV

**>DzCYP72A24**

MELVMGVIWTVTAAVVVVWAWRTLWDVWWTPRRLDRDLRRQGLRGNYRLLHGDLKENA  
RLSKEATSRPLPLHCHEIAPRVAPLIHNAIKDHGKISITWLGYPYPRVSLMDPDLVKEVLSNKFGH

FVKPRITPIAKFLVQGLVAYEGEKWAKHRRRIINPAFHLEKCLKMLPAFSTSSGELIRRWEKMIPDE  
GSQELNVSPEIQNLTGDISRTAFGSSYEEGRRIPELLTEQIHILTIPALQTVYIPGYRFLPTPMNNR  
RSQVYNEMKRILKGMIEKREKAIRMGESSKNDLLGLLDSNMKEGEEQEKSQNKVMSTEDVI  
EECKLFYFAGQETTSVLLTWTMILLSMYPNWQAKAREEVQLQVFGKSTPDMDGLSRLKIVTMIL  
YEVLRLYPPVTFLTRKTYKAMELGGINYPGVLQLPLLFIIHHDPEFWGEDAKEFNPERFSEGIL  
KASKVPGAFFPFGGGPRICIGQSFALIEAKIGISMILQHFSFELSPSYIHAPHTPLTLQPQHGAQLM  
LQKL

**>DzCYP72A25**

MEYSVAAGVKEMIWGVATALLVVVWVRTLEWLWWKPRRLERELKRQGLRGGKYRLFHGDL  
KDNARLMKDALSRLPPYSHDVAQRVIPLVHQAIIHGKMSITWLGYPYPRVSLMDPELIREVLS  
NKFGHFVKPNFSPLVKLLAQGLASHEGEKWAKHRRRIINPAFHFEKCLKMLPAFSTCCDELVKR  
WQNKMNVEGSIELNMWPELQNLTGDISRTAFGSCYEEGRRIIFQLQTEQAELIPTAQTIVYVPG  
FRFLPTPKNNRRKAIDREIKTILRSMIEKREKAIRMGGETSCKDDLGLLLESNMKETEQQGRS  
KNKGLTTEDVIECKLFYLAGQETTSSLTWTMVLLSMYPNWQAKAREEVQLQVFGKNKPD  
DVGRLKIVTMILYEVLRLYPPAIFLTRRTYKTMELGGITYPPGVLLLLPIILVHHDLDLFWGEDA  
KDFKPDRFAEGISKASKVPGAFFPFGGGPRICIGQSFALIEAKLGLSMILQNFSFELSPSYIHAPYT  
LVTLPQHGAPIKLHKL
