# Supplementary material for: Genome-Wide Identification of CYP72A Gene Family and Expression Patterns Related to Jasmonic Acid Treatment and Steroidal Saponin Accumulation in Dioscorea zingiberensis
Source: MDPI journal article supplement (doi:10.3390/ijms222010953), 2021-10-11
Supplement: s1 [file s1]

Table S7 Quantitative determinations of each specialized metabolites

| Compound name       | Regression equation    | $r^2$  |
|---------------------|------------------------|--------|
| Diosgenin           | $y=5*10^{-7}x+1.6219$  | 0.9937 |
| Parvifloside        | $y=8*10^{-8}x-47.3690$ | 0.9991 |
| Protodeltonin       | $y=8*10^{-8}x-61.2890$ | 0.9972 |
| Dioscin             | $y=2*10^{-7}x-0.0007$  | 0.9755 |
| Cholesterol         | $y=8*10^{-8}x+0.6829$  | 0.9960 |
| Campesterol         | $y=6*10^{-8}x+2.0574$  | 0.9965 |
| Stigmasterol        | $y=3*10^{-8}x+0.9850$  | 0.9977 |
| $\beta$ -sitosterol | $y=4*10^{-8}x+1.7157$  | 0.9987 |

Note:  $y$ , the content of specialized metabolites;  $x$ , peak area;  $r^2$ , regression coefficient
