# Supplementary material for: Genome-Wide Identification of CYP72A Gene Family and Expression Patterns Related to Jasmonic Acid Treatment and Steroidal Saponin Accumulation in Dioscorea zingiberensis
Source: MDPI journal article supplement (doi:10.3390/ijms222010953), 2021-10-11
Supplement: s1 [file s1]

Table S4 Primer sequences used for quantitative real-time PCR

| Name       | Forward primer Sequence (5' →3') | Reverse primer Sequence (5' →3') |
|------------|----------------------------------|----------------------------------|
| DzCYP72A1  | GTTTGGTGGAAGCCGAGGAG             | ATCTTTGATGGCGTTGTGGA             |
| DzCYP72A2  | AACCTACAAAGCAATGGAAGTCG          | AAAAGCAGGGTCATGGTGAAT            |
| DzCYP72A3  | CCCAAGACAAAGGGATGAGC             | GCCTGCCAGTTCGGATACA              |
| DzCYP72A4  | ATGTATCCGAACTGGCAGACTAA          | GGTCACAATCTTCAAGTGGCTC           |
| DzCYP72A5  | AGCAATGGAAGTCGGTGGG              | AAAAGCAGGGTCATGGTGAAT            |
| DzCYP72A6  | CCCAAGACAAAGGGATGAGC             | GCCTGCCAGTTCGGATACA              |
| DzCYP72A7  | ATGTATCCGAACTGGCAGACTAA          | GGTCACAATCTTCAAGTGGCTC           |
| DzCYP72A8  | AAGCATCCAAAGTTCCAGGTG            | GCTTTTGCAGCATGAGTTGAG            |
| DzCYP72A9  | GGGATTGAACCACTTGAAGATTG          | CACCGAGTTCCATTGCTTTGTA           |
| DzCYP72A10 | CCGAAGTGGCAGGCTAATG              | TCAAGTGGCTCAATCCCTCTAT           |
| DzCYP72A11 | CCCAAAACAAAGGGATGAGC             | GCCTGCCAGTTCGGATACA              |
| DzCYP72A12 | CGGTAGCAGTTACGAAGACGG            | GCAGAAATCGAAAACCAGGAA            |
| DzCYP72A13 | ACCCCGCATTCATCTTG                | AGACATTTAGTTCTTGGGAGCCT          |
| DzCYP72A14 | TGGCAGAACAAAGATGAATGTAGAG        | ATACAGTCTGAGCGGTTGGAATA          |
| DzCYP72A15 | GCTGACCTGGACACTGATACTTTT         | TGGCATGTTCTTCCACAAAT             |
| DzCYP72A16 | AGGCATCAAAGGGTCAGAATG            | CCCAACTGAGGCTGAAGAGTG            |
| DzCYP72A17 | TCTATCTTCCAGGCTTTAGGTTCC         | TCAGCGTTTTCTCCGATTTTC            |
| DzCYP72A18 | GAGGATGCTGAAGAGTTCAAACC          | CCCAGCCAAACGGAAAGA               |
| DzCYP72A19 | TACCTGCTGGAGCTGAAGTCG            | GCCCCAACCAAAAGGAAAG              |
| DzCYP72A20 | ACGATGAATGTTGCCACTGAA            | TGCCAAGTAGGGTACATGGATAA          |
| DzCYP72A21 | TTGGGCAAACCTTTCGCTATG            | AAGGGTTATTACAGTGTAAGGAGCA        |
| DzCYP72A22 | TGGCAGAAGAAAGCAAGGG              | TCAGCTCCAGCAGGTAATGTTATA         |
| DzCYP72A23 | GGTGCCTTCTTTCCTTTCGG             | AGAGTAATAACATTGTGCGGTGC          |
| DzCYP72A24 | ACCCCGCATTCATCTTG                | AGACATTTAGTTCTTGGGAGCCT          |
| DzCYP72A25 | CACGGCGATCTCAAGGACA              | GCTAACAGTTTCACAAGGGGAC           |
| DzActin    | ATGCCATTCTTCGTTTGGAC             | CTACTCTTGGCGGTTTCCAG             |
| DzGAPDH    | TTTGGTGAAAAGTCAGTCGCA            | TCGGAGCAGAAATGACAACCT            |
